# Supplementary material for: Concise total syntheses of bis(cyclotryptamine) alkaloids via thio-urea catalyzed one-pot sequential Michael addition
Source: Royal Society of Chemistry journal article supplement (doi:10.1039/d2cc01008a), 2022-01-01
Supplement: d2cc01008a1.pdf [file d2cc01008a1.pdf]

*Supporting Information*

**Concise Total Syntheses of Bis(cyclotryptamine) Alkaloids via Thio-Urea  
Catalyzed One-Pot Sequential Michael Addition**

Arindam Khatua,<sup>a</sup> Pranay Shyamal,<sup>b</sup> Souvik Pal,<sup>a</sup> Ayan Mondal,<sup>b</sup> and Alakesh Bisai<sup>\*a,b</sup>

<sup>a</sup>Department of Chemistry, Indian Institute of Science Education and Research Bhopal, Bhauri,  
Bhopal - 462 066, Madhya Pradesh, India

<sup>b</sup>Department of Chemical Science, Indian Institute of Science Education and Research Kolkata,  
Mohanpur Campus, Kalyani, Nadia – 741 246, West Bengal, INDIA.

e-mail: [alakesh@iiserkol.ac.in](mailto:alakesh@iiserkol.ac.in); [alakeshb@gmail.com](mailto:alakeshb@gmail.com)

**Table of Contents**

|                                                                         |         |
|-------------------------------------------------------------------------|---------|
| Preparation and characterization of compound <b>13</b>                  | S3-S5   |
| Preparation and characterization of Michael acceptor <b>S3</b>          | S5-S6   |
| Preparation and characterization of catalysts <b>C8-C12</b>             | S6-S9   |
| Optimization of sequential Michael addition of dimeric 2-oxindoles      | S9-S10  |
| Preparation and characterization of compound (+)- <b>12</b>             | S11     |
| Preparation and characterization of compound (+)- <b>10</b>             | S11-S12 |
| Preparation and characterization of compound (+)- <b>9</b>              | S13-S14 |
| Preparation and characterization of compound (+)- <b>8</b>              | S14-S15 |
| Total synthesis and characterization of (+)-chimonanthine ( <b>2a</b> ) | S15-S18 |
| Total synthesis and characterization of (+)-folicanthine ( <b>2b</b> )  | S19-S22 |
| Total synthesis and characterization of (+)-calycanthine ( <b>1</b> )   | S23-S26 |
| Spectral and HPLC traces                                                | S27-S51 |

## Materials and Methods

Unless otherwise stated, reactions were carried out using oven dried glassware with Teflon-coated magnetic stirring bars were used to stir the reactions. The Syringe was used to transfer the solvents and liquid reagents. Tetrahydrofuran (THF), Diethyl ether (Et<sub>2</sub>O) were distilled over sodium/benzophenone ketyl. Dichloromethane (CH<sub>2</sub>Cl<sub>2</sub>) was distilled over calcium hydride. All other solvents like Nitromethane, MeOH, EtOAc, DMF, Dichloroethane (DCE) and reagents were used as received. Reaction temperatures above 25 °C were maintained by using oil-bath on a magnetic stirrer. Thin layer chromatography (TLC) analysis was performed by using silicagelprecoated plates (0.25 mm) 60 (F-254), Visualized by UV irradiation, yellow dip stain and other stains. Silicagel of particle size 230-400 and 100-200 mesh were used to perform flash chromatography. Digital melting point apparatus is used to record the melting points. <sup>1</sup>H NMR spectra were recorded by using 400, 500 700 MHz spectrometers, <sup>13</sup>C NMR operating frequencies are 100, 125 175 MHz respectively. Chemical shifts (δ) are reported in ppm relative to the residual solvents (CDCl<sub>3</sub>) signal (δ = 7.24 for <sup>1</sup>H NMR and δ = 77.0 for <sup>13</sup>C NMR) and (DMSO-D<sub>6</sub>) signal (δ = 2.50 for <sup>1</sup>H NMR and δ = 39.5 for <sup>13</sup>C NMR). Data for <sup>1</sup>H NMR spectra are reported as follows: chemical shift (multiplicity, coupling constants, number of hydrogen). Abbreviations are as follows: s (singlet), d (doublet), t (triplet), q (quartet), m (multiplet), br (broad). IR spectra were recorded on an FT-IR system (Spectrum BX) and are reported in frequency of absorption (cm<sup>-1</sup>). Only selected IR absorbencies are reported. High-Resolution Mass Spectrometry (HRMS) data were recorded on MicroTOF-Q-II mass spectrometer using methanol as solvent.

**Preparation of Boc-protected iso-indigo compound (S2):**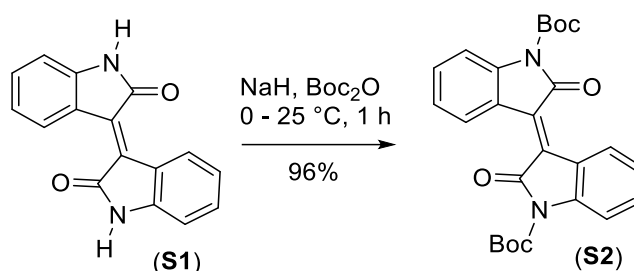

In an oven dry round bottom flask, compound **S1** (10 gm, 38.13 mmol, 1.0 equiv.) was taken in dry THF (100 ml) and then allowed to stir for 5 min. Then NaH (2.0 gm, 83.9 mmol, 2.2 equiv.) was added portion-wise to the reaction mixture and allowed to stir for another 30 mins followed by the addition of di-*tert*-butyl decarbonate (17.4 ml, 83.9 mmol, 2.2 equiv.). After complete consumption of starting materials (as judged by running TLC), saturated NH<sub>4</sub>Cl (20 mL) was added at 0 °C followed by the addition of brine (20 mL) and it was extracted with EtOAc (25 mL X 2). The combined organic layers were dried over Na<sub>2</sub>SO<sub>4</sub>, filtered and concentrated under the reduced pressure. The crude mixture was purified by flash chromatography using ethyl acetate and n-hexane (1:9) as eluents.

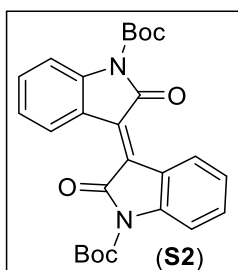

**Di-*tert*-butyl (*E*)-2,2'-dioxo-[3,3'-biindolinylidene]-1,1'-dicarboxylate (S2):** Compound **S2** was obtained as red foam (38.13 mmol scale of reaction, 16.9 g of product, 96% yield);  $R_f$  = 0.6 (10% EtOAc in hexane).

**<sup>1</sup>H NMR** (400 MHz, CDCl<sub>3</sub>)  $\delta$  8.94 (d,  $J$  = 7.9 Hz, 1H), 7.80 (d,  $J$  = 8.1 Hz, 1H), 7.46 – 7.39 (m, 1H), 7.15 (t,  $J$  = 7.7 Hz, 1H), 1.66 (s, 9H).

**<sup>13</sup>C NMR** (100 MHz, CDCl<sub>3</sub>)  $\delta$  165.9, 148.8, 141.3, 133.3, 132.8, 129.2, 124.2, 121.9, 114.4, 84.9, 28.2.

### Reduction of compound S2:

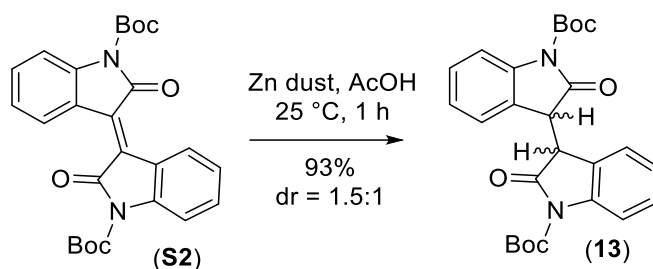

An oven dried round bottom flask was charged with compound **S2** (15 gm, 32.43 mmol, 1.0 equiv.) in acetic acid (80 ml). To this solution was added Zn dust (10.6 gm, 162.2 mmol, 5.0 equiv.) portion-wise and allowed to stir at room temperature for another 1 h. After complete consumption of starting materials (monitored by running TLC), the reaction mixture was quenched with saturated NaHCO<sub>3</sub> (15 mL) and then extracted with EtOAc (30 mL X 2). The organic layers were separated and washed with brine (30 mL X 1). The combined organic layers were dried over Na<sub>2</sub>SO<sub>4</sub>, filtered and concentrated under the reduced pressure. The crude mixture was purified using column chromatography (15% EtOAc in Petroleum Ether) to afford the desired mixture of diastereomers as an orange foam.

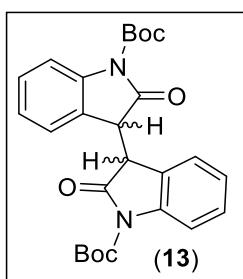

**Di-tert-butyl 2,2'-dioxo-[3,3'-biindoline]-1,1'-dicarboxylate (13):** Compound **13** was obtained as a mixture of 1.5:1 diastereomers (32.43 mmol scale of reaction, 14.0 gm of product, 93% yield);  $R_f = 0.42$  (30% EtOAc in hexane).

**<sup>1</sup>H NMR** (400 MHz, CDCl<sub>3</sub>) δ 7.82 (d, *J* = 8.3 Hz, 1H), 7.65 (d, *J* = 8.1 Hz, 1H), 7.30 (td, *J* = 7.9, 1.5 Hz, 1H), 7.16 – 7.11 (m, 1H), 7.03 (t, *J* = 7.5 Hz, 1H), 6.96 – 6.88 (m, 1H), 6.79 (d, *J* = 7.4 Hz, 1H), 4.42 (s, 1H), 4.32 (s, 1H), 1.66 (s, 6H), 1.56 (d, *J* = 5.0 Hz, 9H).

**$^{13}\text{C}$  NMR** (100 MHz,  $\text{CDCl}_3$ )  $\delta$  174.2, 172.8, 148.9, 148.9, 141.0, 140.2, 129.1, 128.9, 124.5, 124.5, 124.3, 123.2, 123.2, 123.1, 115.5, 114.9, 84.8, 84.4, 47.5, 47.3, 28.1, 28.0.

**IR** (film) $\nu_{\text{max}}$ : 2981, 1765, 1731, 1481, 1466, 1370, 1351, 1299, 1252, 1150, 1091, 753  $\text{cm}^{-1}$ .

**HRMS** (ESI-TOF)  $m/z$ :  $[\text{M}+\text{Na}]^+$  Calcd for  $[\text{C}_{26}\text{H}_{28}\text{N}_2\text{O}_6 + \text{H}]^+$  465.2045; Found 465.2033.

### Preparation of the Michael acceptor phenyl vinyl selenone **S3**:

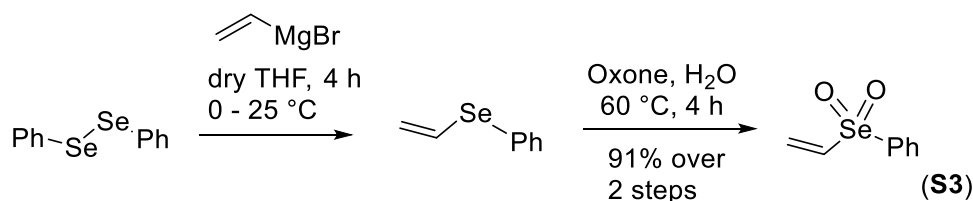

In an oven dried RB flask, diphenyl di-selenide ( $\text{PhSe-SePh}$ , 9.0 gm, 2.88 mmol, 1.0 equiv.) was taken in THF (80 mL) and 1.0 (M) solution of vinyl magnesium bromide in THF (6.3 mL, 6.34 mmol, 2.2 equiv.) was added slowly to the reaction vessel over a period of 5 minutes maintaining the temperature at 0  $^\circ\text{C}$ . The reaction mixture was warmed to room temperature and stirring continued for another 4 h. The reaction mixture was quenched with aqueous  $\text{NH}_4\text{Cl}$  (15 mL), diluted with water (10 mL) and extracted with EtOAc (15 mL X 3). The combined organic layers were dried over  $\text{Na}_2\text{SO}_4$ , filtered and concentrated under reduced pressure. The crude product was purified by flash chromatography (2% EtOAc in *n*-hexane) on silica gel to afford the pure product.

To a solution of the phenyl vinyl selenide (2.88 mmol, 1.0 equiv.) in water (20 mL) oxone ( $2\text{KHSO}_5\cdot\text{KHSO}_4\cdot\text{K}_2\text{SO}_4$ ) (965 mg, 6.33 mmol, 2.2 equiv.) was added portion wise at room temperature over a period of 10 min. The reaction mixture was warmed to 60  $^\circ\text{C}$  and stirred until complete consumption of the starting material (judged by running TLC, 4 h). The reaction mixture was extracted with EtOAc (15 mL X 2). The combined organic layers were washed with brine, dried over  $\text{Na}_2\text{SO}_4$ , filtered and concentrated under reduced pressure. The crude product was purified by flash chromatography on silica gel to afford the desired phenyl vinyl selenone **S3**.

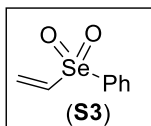

**(Vinylselenonyl)benzene (S3):** Compound **S3** was obtained as white solid (mp: 110-112 °C) (563 mg of product, 91% yield);  $R_f = 0.55$  (3% EtOAc in hexane).

**$^1\text{H}$  NMR** (400 MHz,  $\text{CDCl}_3$ )  $\delta$  7.87 (d,  $J = 7.8$  Hz, 2H), 7.61 (t,  $J = 7.2$  Hz, 1H), 7.52 (t,  $J = 7.6$  Hz, 2H), 6.64 (dd,  $J = 16.5, 9.9$  Hz, 1H), 6.43 (d,  $J = 16.5$  Hz, 1H), 6.02 (d,  $J = 9.7$  Hz, 1H)  
 **$^{13}\text{C}$  NMR** (100 MHz,  $\text{CDCl}_3$ )  $\delta$  139.6, 138.5, 133.8, 129.5, 127.9, 127.9.

**IR** (film) $\nu_{\text{max}}$ : 3043, 1448, 1370, 1221, 1064, 980, 929, 880, 761, 685  $\text{cm}^{-1}$ .

#### Preparation of catalyst **C8** from **C3**:

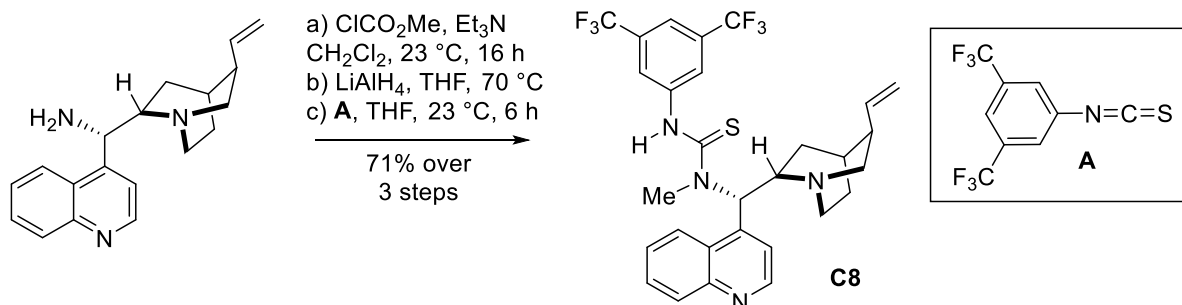

A flame-dried sealed tube (25 mL) was charged with amine (0.886 mmol, 1 equiv.) in dichloromethane (10 mL) and triethylamine was (0.886 mmol, 1 equiv.) added to it. Chloromethylformate [ $\text{ClCOOMe}$  (0.886 mmol, 1 equiv.)] was added drop-wise to the reaction mixture at room temperature and stirring continued for 16 h. After completion of the reaction (as monitored by running TLC), water (10 mL) was added and extracted with  $\text{CH}_2\text{Cl}_2$  (20 mL X 2). Next, the combined organic phases were dried over  $\text{Na}_2\text{SO}_4$  and evaporated under reduced pressure. The crude carbamate was charged for the next step without further purification. [For the preparation of the amine, please see, Dixon *et. al. Chem. Eur. J.* 2013, **19**, 14286.]

In a flame-dried 100 mL round-bottom, carbamate (0.886 mmol, 1.0 equiv.) was taken in dry THF (20 mL). The mixture was cooled to 0 °C and LiAlH<sub>4</sub> (1.33 mmol, 1.5 equiv.) was slowly added to the reaction mixture in portions. Then the reaction mixture was refluxed at 70 °C for 1 h and then cooled again to 0 °C. Then, the reaction mixture was successively quenched with dropwise addition of EtOAc (3 mL), water (2 mL), 20% KOH aqueous solution (5 mL) and stirred until the slurry changed colour from grey to white (1 h). The whole mixture was filtered through a celite pad and the solid was washed with Et<sub>2</sub>O (3 X 30 mL) and concentrated in rotary evaporator under reduced pressure. Next, the filtrate was dried over Na<sub>2</sub>SO<sub>4</sub> and evaporated yielding a crude product.

To a solution of *N*-methylated secondary amine (0.886 mmol, 1.0 equiv.) in dry THF (10 mL) was added 3,5-bis(trifluoromethyl)phenyl isothiocyanate (**A**) (0.945 mmol, 1.1 equiv.) at room temperature. The mixture was stirred overnight at the same temperature to completion of the reaction. The solvents were evaporated and the residue was purified by flash chromatography (5% to 10% MeOH in CH<sub>2</sub>Cl<sub>2</sub>) to give **C8** as a white foam (71% yield).

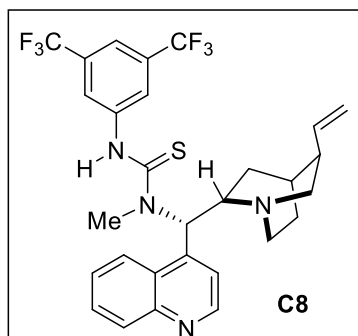

**3-(3,5-Bis(trifluoromethyl)phenyl)-1-methyl-1-((1S)-quinolin-4-yl)-((2S)-5-vinylquinuclidin-2-yl)methylthiourea (**C8**):** Compound **C8** was obtained as white solid (mp: 170-171 °C) (364 mg of product, 71% yield); *R<sub>f</sub>* = 0.35 (10% MeOH in CH<sub>2</sub>Cl<sub>2</sub>).

**<sup>1</sup>H NMR** (400 MHz, CDCl<sub>3</sub>) δ 8.85 (d, *J* = 4.7 Hz, 1H), 8.16 – 8.13 (m, 2H), 8.11 (d, *J* = 7.7 Hz, 1H), 7.71 – 7.66 (m, 1H), 7.61 (d, *J* = 4.4 Hz, 1H), 7.56 – 7.52 (m, 1H), 7.52 – 7.47 (m, 1H), 7.43 – 7.40 (m, 1H), 5.80 (ddd, *J* = 17.0, 10.4, 6.2 Hz, 1H), 5.55 (d, *J* = 9.6 Hz, 1H), 5.30 – 5.14 (m, 2H), 3.89 – 3.78 (m, 1H), 3.70 (dt, *J* = 13.0, 9.3 Hz, 1H), 3.40 – 3.27 (m, 2H), 3.17 (q, *J* = 9.5 Hz, 1H), 2.78 – 2.68 (m, 1H), 2.19 – 2.09 (m, 2H), 2.00 (s, 3H), 1.86 – 1.75 (m, 2H), 1.01 – 0.73 (m, 1H).

**$^{13}\text{C}$  NMR** (100 MHz,  $\text{CDCl}_3$ )  $\delta$  172.4, 152.9, 138.5, 135.3, 133.0, 130.4, 130.0, 127.7, 126.9, 123.9, 123.4, 111.9, 60.6, 56.0, 51.8, 38.9.

**IR** (film)  $\nu_{\text{max}}$ : 3212, 1654, 1125, 889, 681  $\text{cm}^{-1}$ .

**General procedure for the preparation of C11 and C12:**

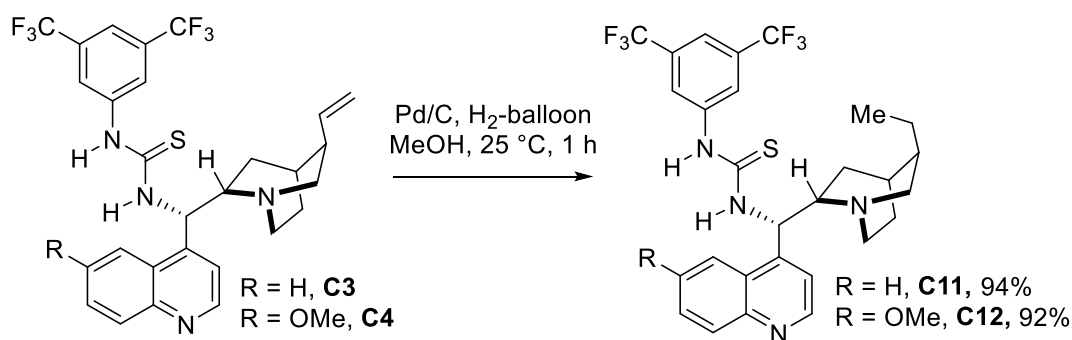

To an oven dried round bottom flask catalyst **C3** (0.887 mmol, 1.0 equiv.) was taken in  $\text{MeOH}$  and the mixture was purged with  $\text{N}_2$  atmosphere for 15 min and then  $\text{Pd-C}$  (50 mg of 10%  $\text{Pd-C}$ ) was added to the reaction mixture portion-wise. After an additional 5 min of stirring the reaction vessel was charged with  $\text{H}_2$ -balloon and allowed to stir for another 1 h. After complete consumption of starting material (judged by running TLC)  $\text{H}_2$ -balloon was removed very cautiously, and then mixture was concentrated under reduced pressure. The crude mixture was purified by flash chromatography using methanol and dichloromethane as eluents [2-3%  $\text{MeOH}/\text{CH}_2\text{Cl}_2$ ].

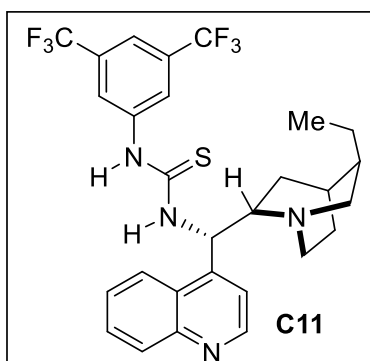

**1-(3,5-Bis(trifluoromethyl)phenyl)-3-((1S)-((2S)-5-ethylquinuclidin-2-yl)(quinolin-4-yl)methyl)thiourea (C11):** Compound **C11** was obtained as white solid (mp: 174-175 °C) (472 mg of product, 94% yield);  $R_f = 0.25$  (5% MeOH in  $\text{CH}_2\text{Cl}_2$ ).

**$^1\text{H}$  NMR** (400 MHz,  $\text{CDCl}_3$ )  $\delta$  8.96 (d,  $J = 4.5$  Hz, 1H), 8.24 (d,  $J = 8.5$  Hz, 1H), 8.20 (d,  $J = 8.4$  Hz, 1H), 7.78 (t,  $J = 7.6$  Hz, 1H), 7.71 – 7.53 (m, 2H), 7.49 – 7.38 (m, 2H), 7.29 – 6.95 (m, 1H), 3.40 – 3.30 (m, 2H), 3.28 – 3.19 (m, 1H), 2.95 – 2.83 (m, 2H), 2.34 – 2.26 (m, 1H), 1.67 – 1.55 (m, 3H), 1.44 – 1.35 (m, 1H), 1.29 – 1.23 (m, 1H), 0.76 (dd,  $J = 13.9, 7.7$  Hz, 1H).

**$^{13}\text{C}$  NMR** (100 MHz,  $\text{CDCl}_3$ )  $\delta$  171.1, 150.1, 148.9, 142.3, 141.4, 132.6, 132.1, 130.8, 129.6, 129.1, 128.7, 127.3, 126.7, 114.6, 60.4, 59.7, 56.1, 41.0, 39.5, 29.7, 28.0, 27.3, 26.2, 14.2.

**IR** (film)  $\nu_{\text{max}}$ : 3244, 1634, 752, 681  $\text{cm}^{-1}$ .

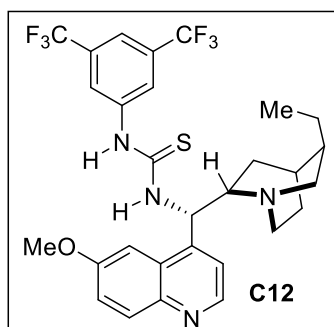

**1-(3,5-Bis(trifluoromethyl)phenyl)-3-((1S)-((2S)-5-ethylquinuclidin-2-yl)(6-methoxyquinolin-4-yl)methyl)thiourea (C12):** Compound **C12** was obtained as white solid (mp: 171-173 °C) (0.887 mmol scale of reaction, 462 mg of product, 92% yield);  $R_f = 0.20$  (5% MeOH in  $\text{CH}_2\text{Cl}_2$ ).

**$^1\text{H}$  NMR** (400 MHz,  $\text{CDCl}_3$ )  $\delta$  8.57 (s, 1H), 8.05 (s, 1H), 7.97 (d,  $J = 9.3$  Hz, 1H), 7.86 (s, 1H), 7.60 (s, 1H), 7.57 (s, 1H), 7.48 – 7.46 (m, 1H), 7.38 (d,  $J = 7.4$  Hz, 1H), 7.17 (d,  $J = 4.6$  Hz, 1H), 3.96 (s, 3H), 3.68 (d,  $J = 7.9$  Hz, 1H), 3.15 – 3.09 (m, 1H), 2.96 (dd,  $J = 14.2, 9.8$  Hz, 2H), 2.90 – 2.79 (m, 2H), 2.32 (q,  $J = 7.9$  Hz, 1H), 1.65 (s, 1H), 1.62 – 1.46 (m, 3H), 1.24 (s, 3H), 1.22 (d,  $J = 2.3$  Hz, 1H), 0.98 – 0.83 (m, 2H).

**$^{13}\text{C}$  NMR** (100 MHz,  $\text{CDCl}_3$ )  $\delta$  178.0, 141.2, 140.1, 138.3, 133.5, 125.5, 125.0, 123.7, 123.1, 122.1, 120.0, 119.3, 115.7, 110.5, 110.4, 109.9, 108.5, 75.4, 53.9, 52.4, 46.0, 37.5, 30.8, 29.8, 27.5, 25.9, 21.6, 10.8.

**IR** (film)  $\nu_{\text{max}}$ : 3244, 1634, 752, 681  $\text{cm}^{-1}$ .

**Experimental Procedure for a One-Pot Sequential Michael addition of Dimeric 2-Oxindoles onto Phenylvinylselenone:**

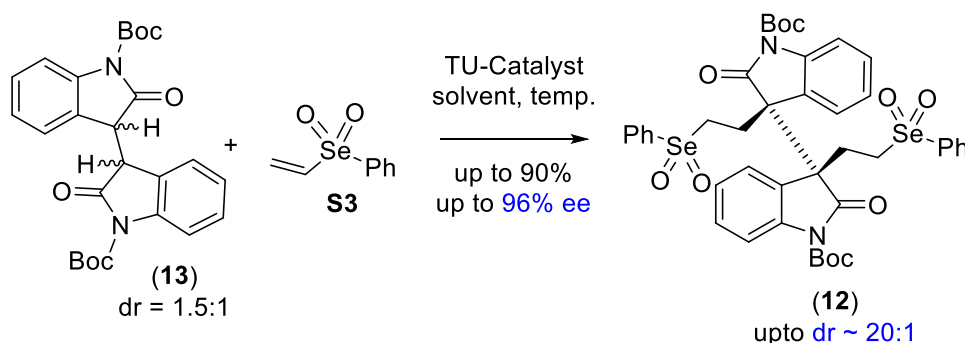

The diastereomeric mixture (*ca.* 1.5:1) of dimeric 2-oxindole (**13**) (115 mg, 0.25 mmol, 1.0 equiv.) was taken in solvent (6 mL; see optimization table) and thio-urea catalyst (**C1-C12**) (0.025 mmol) was added to the reaction mixture at room temperature and stirred for 5 minutes. To this reaction mixture was added phenylvinyl selenone (**S3**) (118 mg, 0.55 mmol, 2.2 equiv.) slowly over a period of 2 minutes. Then, the reaction mixture was allowed to stir till the complete consumption of the starting material (judged by running TLC) at specified temperature (see optimization table). The reaction mixture was concentrated under reduced pressure and the crude product was purified by flash chromatography using silica as a stationary phase and ethyl acetate and *n*-hexane as mobile phase. (For details about the reaction conditions please see the optimization table)

## Catalyst screening for the Sequential Michael addition of dimeric 2-oxindoles:

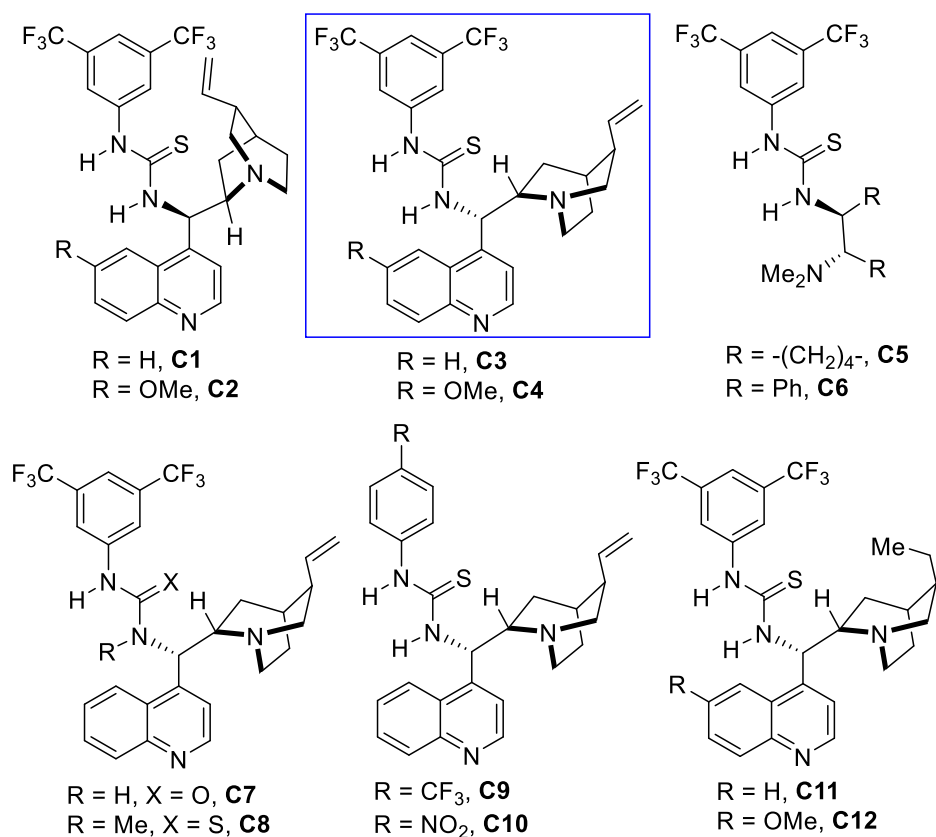

## Detailed optimization of sequential Michael addition of dimeric 2-oxindoles onto phenylvinyl selenone:

| S. N. | Substrate /Cat. | solvent                         | Temp (°C) | dr    | Time/product    | Yield (%) | ee   |
|-------|-----------------|---------------------------------|-----------|-------|-----------------|-----------|------|
| 1     | <b>15a/C1</b>   | CH <sub>2</sub> Cl <sub>2</sub> | 25 °C     | ---   | 5d/ <b>16a</b>  | ---       | ---  |
| 2     | <b>15b/C1</b>   | CH <sub>2</sub> Cl <sub>2</sub> | 25 °C     | ---   | 5d/ <b>16b</b>  | ---       | ---  |
| 3     | <b>15c/C1</b>   | CH <sub>2</sub> Cl <sub>2</sub> | 25 °C     | ---   | 5d/ <b>16c</b>  | ---       | ---  |
| 4     | <b>13/C1</b>    | CH <sub>2</sub> Cl <sub>2</sub> | 25 °C     | ~20:1 | 72 h/ <b>12</b> | 79%       | -84% |
| 5     | <b>13/C1</b>    | PhMe                            | 25 °C     | ~12:1 | 72 h/ <b>12</b> | 62%       | -87% |
| 6     | <b>13/C1</b>    | MeCN                            | 25 °C     | ~20:1 | 72 h/ <b>12</b> | 88%       | -89% |
| 7     | <b>13/C2</b>    | MeCN                            | 25 °C     | ~20:1 | 72 h/ <b>12</b> | 86%       | -93% |
| 8     | <b>13/C2</b>    | MeCN                            | 0 °C      | ~20:1 | 96 h/ <b>12</b> | 64%       | -90% |
| 9     | <b>13/C3</b>    | MeCN                            | 25 °C     | ~20:1 | 72 h/ <b>12</b> | 90%       | 96%  |
| 10    | <b>13/C3</b>    | MeCN                            | 0 °C      | ~20:1 | 96 h/ <b>12</b> | 72%       | 93%  |
| 11    | <b>13/C3</b>    | CHCl <sub>3</sub>               | 0 °C      | ~20:1 | 96 h/ <b>12</b> | 72%       | 91%  |
| 12    | <b>13/C4</b>    | MeCN                            | 25 °C     | ~20:1 | 72 h/ <b>12</b> | 84%       | 87%  |
| 13    | <b>13/C5</b>    | MeCN                            | 25 °C     | ~9:1  | 96 h/ <b>12</b> | 72%       | 70%  |

|    |               |      |       |       |                 |     |     |
|----|---------------|------|-------|-------|-----------------|-----|-----|
| 14 | <b>13/C6</b>  | MeCN | 25 °C | ~12:1 | 96 h/ <b>12</b> | 81% | 67% |
| 15 | <b>13/C7</b>  | MeCN | 25 °C | ~20:1 | 96 h/ <b>12</b> | 80% | 78% |
| 16 | <b>13/C8</b>  | MeCN | 25 °C | ~9:1  | 96 h/ <b>12</b> | 41% | ND  |
| 17 | <b>13/C9</b>  | MeCN | 25 °C | ~20:1 | 72 h/ <b>12</b> | 82% | 76% |
| 18 | <b>13/C10</b> | MeCN | 25 °C | ~20:1 | 72 h/ <b>12</b> | 76% | 72% |
| 19 | <b>13/C11</b> | MeCN | 25 °C | ~20:1 | 72 h/ <b>12</b> | 82% | 91% |
| 20 | <b>13/C12</b> | MeCN | 25 °C | ~20:1 | 72 h/ <b>12</b> | 79% | 83% |

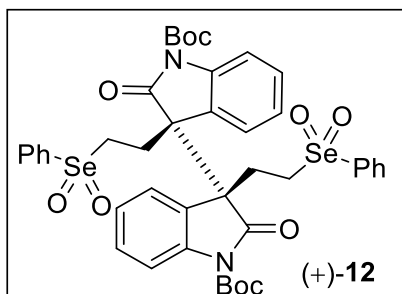

**Di-tert-butyl (3*R*,3'*R*)-2,2'-dioxo-3,3'-bis(2-(phenylselenonyl)ethyl)-[3,3'-biindoline]-1,1'-dicarboxylate [(+)-**12**]:** Compound (+)-**12** was obtained as white foam (0.25 mmol scale of reaction, 201 mg of product, 90% yield);  $R_f = 0.35$  (20% EtOAc in Hexane).

**$^1\text{H}$  NMR** (400 MHz,  $\text{CDCl}_3$ )  $\delta$  7.35 (d,  $J = 5.5$  Hz, 2H), 7.28 (d,  $J = 6.4$  Hz, 2H), 7.18 (d,  $J = 7.8$  Hz, 2H), 7.05 – 6.98 (m, 2H), 6.86 (d,  $J = 7.8$  Hz, 1H), 3.40 – 3.34 (m, 1H), 3.33 – 3.28 (m, 1H), 2.17 – 2.12 (m, 1H), 2.09 – 2.05 (m, 1H), 1.41 (s, 9H).

**$^{13}\text{C}$  NMR** (100 MHz,  $\text{CDCl}_3$ )  $\delta$  175.2, 157.9, 155.4, 129.6, 129.1, 128.5, 126.9, 125.4, 120.4, 109.4, 79.9, 49.5, 33.7, 28.4, 25.6, 24.9.

**IR** (film)  $\nu_{\text{max}}$ : 3244, 2546, 2078, 1634, 1105, 752, 681  $\text{cm}^{-1}$ .

**HRMS** (ESI-TOF)  $m/z$ :  $[\text{M}+\text{H}]^+$  Calcd for  $[\text{C}_{42}\text{H}_{44}\text{N}_2\text{O}_{10} + \text{H}]^+$  897.1420; Found 897.1431.

$[\alpha]_{\text{D}}^{24.0} = +113.89$  ( $c = 2.0$ ,  $\text{CHCl}_3$ ) for (+)-**12** and  $[\alpha]_{\text{D}}^{24.0} = -109.73$  ( $c = 1.5$ ,  $\text{CHCl}_3$ ) for (–)-**12**.



**IR** (film) $\nu_{\text{max}}$ : 3244, 2546, 2078, 1634, 1105, 752, 681  $\text{cm}^{-1}$ .

**HRMS** (ESI-TOF)  $m/z$ :  $[\text{M}+\text{Na}]^+$  Calcd for  $[\text{C}_{18}\text{H}_{24}\text{O}_4 + \text{Na}]^+$  327.1548; Found 327.1567.

$[\alpha]_{\text{D}}^{24.0} = +157.56$  ( $c = 1.5$ ,  $\text{CHCl}_3$ ) for (+)-**10** and  $[\alpha]_{\text{D}}^{24.0} = -125.41$  ( $c = 2.0$ ,  $\text{CHCl}_3$ ) for (–)-**10**.

**Preparation of *bis*-Moc protected compound [(+)-**8**] from *bis*-azide [(+)-**10**] via Staudinger Reaction:**

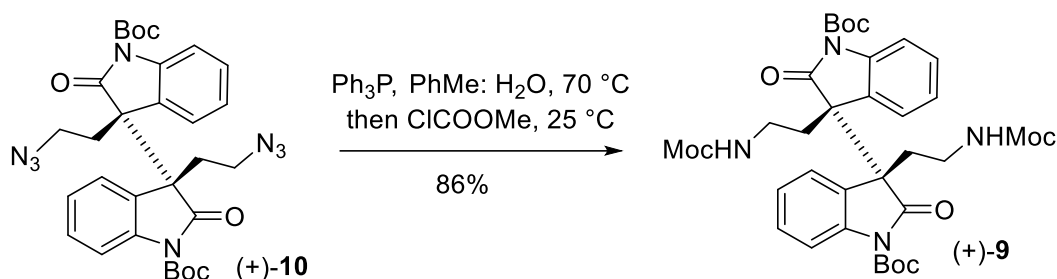

In a round bottom flask compound (+)-**10** (100 mg, 0.166 mmol, 1.0 equiv.) was taken in a mixture of toluene and water (2:1; 9 mL) and triphenyl phosphene (131 mg, 0.498 mmol, 3.0 equiv.) was added to the reaction mixture. The reaction mixture was placed on a pre-heated oil-bath at 70 °C for 3 h. The mixture was allowed to stir until gas stopped evolving. Upon complete consumption of starting material (monitored by TLC), the reaction mixture was cooled to room temperature and saturated sodium bicarbonate ( $\text{NaHCO}_3$ ) solution (5 mL) was added to it. Next, chloromethyl formate (32.0  $\mu\text{L}$ , 0.415 mmol, 2.5 equiv.) was added to the reaction mixture at 25 °C dropwise and the reaction mixture was allowed to stir for an additional 1 h. After completion of starting material, the reaction mixture was extracted with EtOAc (8 mL X 2) and washed with brine (10 mL X 1). The crude product was purified through column chromatography with EtOAc and *n*-hexane as eluents.

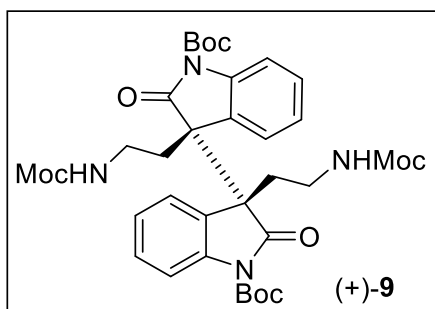

**Di-*tert*-butyl (3*R*,3'*R*)-3,3'-bis(2-((methoxycarbonyl)amino)ethyl)-2,2'-dioxo-[3,3'-biindoline]-1,1'-dicarboxylate [(+)-9]:** Compound (+)-9 was obtained as colourless foam (90 mg of product, 90% yield);  $R_f = 0.20$  (30% EtOAc in Hexane).

**$^1\text{H}$  NMR** (400 MHz,  $\text{CDCl}_3$ )  $\delta$  7.82 (d,  $J = 8.1$  Hz, 2H), 7.32 (t,  $J = 7.9$  Hz, 2H), 7.25 (d,  $J = 7.2$  Hz, 2H), 7.13 (t,  $J = 7.5$  Hz, 2H), 4.94 (s, 2H), 3.55 (s, 6H), 3.29 (d,  $J = 6.7$  Hz, 2H), 2.20 (dt,  $J = 14.0, 6.8$  Hz, 2H), 2.07 (dt,  $J = 14.0, 6.8$  Hz, 2H), 1.28 (s, 18H).

**$^{13}\text{C}$  NMR** (100 MHz,  $\text{CDCl}_3$ )  $\delta$  169.3, 148.6, 132.5, 131.1, 130.6, 129.9, 129.4, 125.4, 119.7, 80.3, 67.7, 66.1, 53.9, 52.6, 41.1.

**IR** (film)  $\nu_{\text{max}}$ : 3244, 2546, 2078, 1634, 1105, 752, 681  $\text{cm}^{-1}$ .

**HRMS** (ESI-TOF)  $m/z$ :  $[\text{M}+\text{Na}]^+$  Calcd for  $[\text{C}_{30}\text{H}_{35}\text{N}_8\text{O}_6 + \text{H}]^+$  603.2690; Found 603.2684.

$[\alpha]_{\text{D}}^{24.0} = +136.23$  ( $c = 2.5$ ,  $\text{CHCl}_3$ ) for (+)-9 and  $[\alpha]_{\text{D}}^{24.0} = +132.75$  ( $c = 2.0$ ,  $\text{CHCl}_3$ ) for (–)-10.

**Boc-deprotection of dimeric 2-oxindole, (+)-8:**

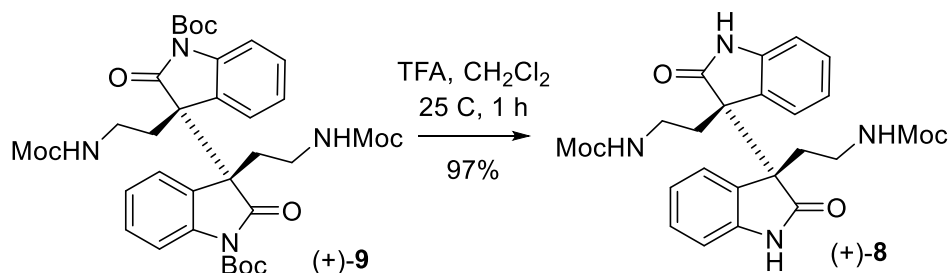

To a solution of compound (+)-**9** (90 mg, 0.149 mmol, 1.0 equiv.) in dichloromethane (5 mL), trifluoroacetic acid (70  $\mu$ L, 0.88 mmol, 6.0 equiv.) was added dropwise at room temperature and allowed to stir at same temperature for 1 h. Then the reaction mixture was quenched with saturated NaHCO<sub>3</sub> solution (5 mL) and extracted with dichloromethane (10 mL X 2). The organic layers were dried over Na<sub>2</sub>SO<sub>4</sub> and concentrated under reduced pressure. The crude product was purified by flash chromatography using EtOAc and *n*-hexane (2:3) to afford the desired product.

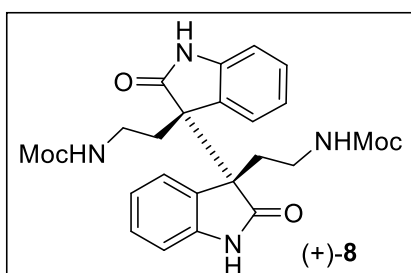

**Dimethyl (((3*R*,3'*R*)-2,2'-dioxo-[3,3'-biindoline]-3,3'-diyl)bis(ethane-2,1-diyl))dicarbamate (+)-**8**:** Compound (+)-**8** was obtained as yellow oil (67 mg of product, 97% yield);  $R_f$  = 0.33 (50% EtOAc in Hexane).

**<sup>1</sup>H NMR** (400 MHz, CDCl<sub>3</sub>)  $\delta$  9.06 (s, 2H), 7.29 (d,  $J$  = 7.6 Hz, 2H), 7.16 (t,  $J$  = 7.6 Hz, 2H), 6.99 (t,  $J$  = 7.7 Hz, 2H), 6.81 (d,  $J$  = 7.8 Hz, 2H), 5.42 (s, 2H), 3.53 (s, 6H), 3.24 (t,  $J$  = 6.9 Hz, 4H), 2.06 (dd,  $J$  = 10.3, 4.8 Hz, 4H).

**<sup>13</sup>C NMR** (100 MHz, CDCl<sub>3</sub>)  $\delta$  180.6, 157.1, 139.7, 129.7, 124.2, 123.1, 110.7, 75.8, 52.1, 37.6, 36.0, 29.7.

**IR** (film) $\nu_{\max}$ : 3244, 2546, 2078, 1634, 1105, 752, 681 cm<sup>-1</sup>.

**HRMS** (ESI-TOF)  $m/z$ : [M+Na]<sup>+</sup> Calcd for [C<sub>24</sub>H<sub>26</sub>N<sub>4</sub>O<sub>6</sub> + H]<sup>+</sup> 467.1925; Found 467.1920.

Enantiomeric excess of pure compound was determined *via* HPLC analysis using a Chiralpak IA column; solvent: hexane/2-propanol = 90/10; flow rate: 1.0 mL/min; detection: at 254 nm):  $t_R$  minor = 11.78 min,  $t_R$  major = 15.29 min.  $[\alpha]_D^{24.0}$  = +289.71 ( $c$  = 0.7, EtOH for 96% ee).

Enantiomeric excess of pure compound was determined *via* HPLC analysis using a Chiralpak IA column; solvent: hexane/2-propanol = 90/10; flow rate: 1.0 mL/min; detection: at 254 nm):  $t_R$  major = 10.89 min,  $t_R$  minor = 15.20 min.  $[\alpha]_D^{24.0} = (-) -265.28$  ( $c = 0.7$ , EtOH for 93% ee).

### Total Synthesis of Chimonanthine (2a):

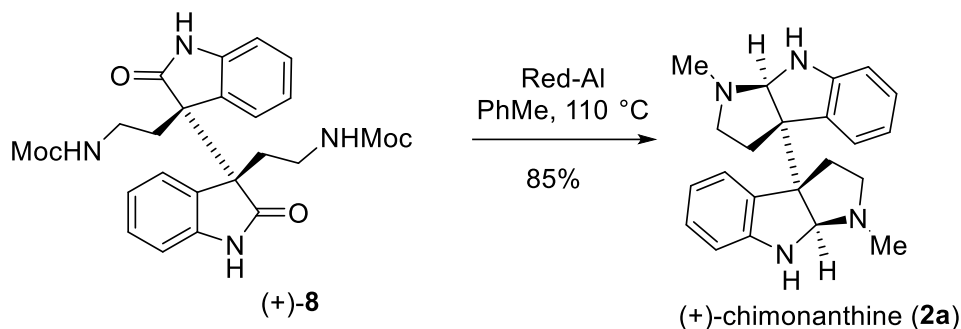

In an oven-dried round-bottom flask was charged with compound (+)-**8** (65 mg, 0.139 mmol, 1.0 equiv.) in 4 mL of dry toluene (PhMe) under nitrogen atmosphere. To this solution, Red-Al (2.3 mL, 1.39 mmol, 10.0 equiv.) was added drop-wise at 0 °C over a period of 2 minutes. After 15 minutes of stirring at room temperature, it was placed over an oil-bath maintaining temperature at 110 °C and stirring continued for 10 h. Then the reaction mixture was slowly cooled to room temperature and then placed it over an ice-bath, and quenched by the careful addition of MeOH (1 mL) and saturated aqueous solution of Rochelle's salt (5 mL). The resulting mixture was extracted with EtOAc (8 mL X 2) and the combined organic layers were dried over anhydrous Na<sub>2</sub>SO<sub>4</sub>, filtered and concentrated in a rotary evaporator under the reduced pressure. The crude product was purified by flash chromatography using 2% (MeOH/CH<sub>2</sub>Cl<sub>2</sub>, saturated with ammonia) as eluent to afford of the desired product.

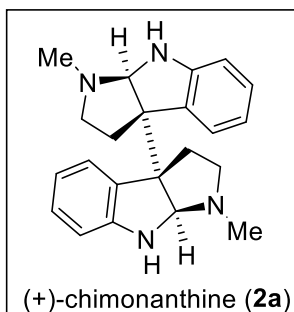

**(3a*R*,3'a*R*,8a*R*,8'a*R*)-1,1'-Dimethyl-2,2',3,3',8,8a,8',8'a-octahydro-1*H*,1'*H*-3a,3'a-bipyrrolo[2,3-*b*]indole (2a):** (+)-Chimonanthine [(+)-**2a**] was obtained as white solid (mp: 177-180 °C) (41 mg of **2a**, 85% yield);  $R_f$  = 0.30 (5 % MeOH in CH<sub>2</sub>Cl<sub>2</sub> saturated with NH<sub>3</sub>).

**<sup>1</sup>H NMR** (500 MHz, CDCl<sub>3</sub>)  $\delta$  7.18 (d,  $J$  = 7.3 Hz, 2H), 6.99 (dd,  $J$  = 7.5 Hz, 2H), 6.66 (dd,  $J$  = 7.5 Hz, 2H), 6.53 (d,  $J$  = 7.5 Hz, 2H), 4.29 (s, 2H), 4.21 (s, 2H), 2.58 - 2.46 (m, 6H), 2.33 (s, 6H), 2.05 (dd,  $J$  = 10.5, 5.1 Hz, 2H).

**<sup>13</sup>C NMR** (125 MHz, CDCl<sub>3</sub>)  $\delta$  150.5, 133.7, 128.2, 124.9, 118.7, 109.4, 85.6, 63.7, 52.7, 37.4, 35.9.

**IR** (film) $\nu_{\max}$ : 3423, 2902, 1589, 1452, 1321 cm<sup>-1</sup>.

**HRMS** (ESI-TOF)  $m/z$ : [M+H]<sup>+</sup> Calcd for [C<sub>22</sub>H<sub>26</sub>N<sub>4</sub> + H]<sup>+</sup> 347.2230; Found 347.2243.

$[\alpha]_D^{24.0}$  = +265.11 ( $c$  = 1.0, EtOH) for (+)-chimonanthine (**2a**) [lit.<sup>1</sup>  $[\alpha]_D^{24.0}$  = +254.0 ( $c$  = 1.0, EtOH)].

Following a similar procedure as described for (+)-Chimonanthine [(+)-**2a**], the total synthesis of (–)-Chimonanthine [(–)-**2a**] was accomplished.

$[\alpha]_D^{24.0}$  = –309.11 ( $c$  = 1.0, EtOH) for (–)-Chimonanthine [(–)-**2a**] [lit.<sup>3</sup>  $[\alpha]_D^{25.0}$  = –328.11 ( $c$  = 1.0, EtOH)].

**Comparison of NMR Data of (+)-Chimonanthine [(+)-**2a**]** of this report with literature of (+)-**(2a)** by Movassaghi<sup>1</sup> and Kanai.<sup>2</sup>

**Comparison of <sup>1</sup>H-NMR Data:**

| Movassaghi's report (+)-chimonanthine ( <b>2a</b> )             |      |        |                         |
|-----------------------------------------------------------------|------|--------|-------------------------|
| ( <sup>1</sup> H-NMR, 500 MHz, CDCl <sub>3</sub> ) <sup>1</sup> |      |        |                         |
| δ (ppm)                                                         | Int. | mult.  | <i>J</i> (Hz)           |
| 7.19                                                            | 2H   | d      | <i>J</i> = 7.5 Hz       |
| 6.98                                                            | 2H   | t      | <i>J</i> = 7.3 Hz       |
| 6.66                                                            | 2H   | t      | <i>J</i> = 7.3 Hz       |
| 6.53                                                            | 2H   | d      | <i>J</i> = 7.5 Hz       |
| 4.40                                                            | 2H   | br-s   | -                       |
| 4.23                                                            | 2H   | s      | -                       |
| 2.57-2.51                                                       | 6H   | m      | -                       |
| 2.33                                                            | 6H   | s      | -                       |
| 2.05                                                            | 2H   | app dd | <i>J</i> = 10.5, 5.0 Hz |

| Matsunaga's report (+)-chimonanthine ( <b>2a</b> )              |      |       |                        |
|-----------------------------------------------------------------|------|-------|------------------------|
| ( <sup>1</sup> H-NMR, 500 MHz, CDCl <sub>3</sub> ) <sup>2</sup> |      |       |                        |
| δ (ppm)                                                         | Int. | mult. | <i>J</i> (Hz)          |
| 7.18                                                            | 2H   | d     | <i>J</i> = 7.5 Hz      |
| 6.98                                                            | 2H   | dd    | <i>J</i> = 7.3 Hz      |
| 6.65                                                            | 2H   | dd    | <i>J</i> = 7.5, 7.5 Hz |
| 6.53                                                            | 2H   | d     | <i>J</i> = 7.5 Hz      |
| 4.39                                                            | 2H   | s     | -                      |
| 4.23                                                            | 2H   | s     | -                      |
| 2.58-2.48                                                       | 6H   | m     | -                      |
| 2.32                                                            | 6H   | s     | -                      |
| 2.05                                                            | 2H   | m     | -                      |

| This report: (+)-chimonanthine ( <b>2a</b> )       |      |       |                         |
|----------------------------------------------------|------|-------|-------------------------|
| ( <sup>1</sup> H-NMR, 500 MHz, CDCl <sub>3</sub> ) |      |       |                         |
| δ (ppm)                                            | Int. | mult. | <i>J</i> (Hz)           |
| 7.18                                               | 2H   | d     | <i>J</i> = 7.3 Hz       |
| 6.99                                               | 2H   | dd    | <i>J</i> = 7.5 Hz       |
| 6.66                                               | 2H   | dd    | <i>J</i> = 7.5 Hz       |
| 6.53                                               | 2H   | d     | <i>J</i> = 7.5 Hz       |
| 4.30                                               | 2H   | s     | -                       |
| 4.21                                               | 2H   | s     | -                       |
| 2.58-2.46                                          | 6H   | m     | -                       |
| 2.33                                               | 6H   | s     | -                       |
| 2.05                                               | 2H   | dd    | <i>J</i> = 10.5, 5.1 Hz |

**Comparison of <sup>13</sup>C-NMR Data:**

| Movassaghi's report of (+)-chimonanthine ( <b>2a</b> ) ( <sup>13</sup> C-NMR, 125 MHz, CDCl <sub>3</sub> ) <sup>1</sup> | Matsunaga's report of (+)-chimonanthine ( <b>2a</b> ) ( <sup>13</sup> C-NMR, 125 MHz, CDCl <sub>3</sub> ) <sup>2</sup> | This report: (+)-chimonanthine ( <b>2a</b> ) ( <sup>13</sup> C-NMR, 125 MHz, CDCl <sub>3</sub> ) |
|-------------------------------------------------------------------------------------------------------------------------|------------------------------------------------------------------------------------------------------------------------|--------------------------------------------------------------------------------------------------|
| 151.08                                                                                                                  | 150.8                                                                                                                  | 150.5                                                                                            |
| 133.79                                                                                                                  | 133.5                                                                                                                  | 133.7                                                                                            |
| 128.22                                                                                                                  | 128.0                                                                                                                  | 128.2                                                                                            |
| 124.64                                                                                                                  | 124.4                                                                                                                  | 124.9                                                                                            |
| 118.78                                                                                                                  | 118.5                                                                                                                  | 118.7                                                                                            |
| 109.39                                                                                                                  | 109.1                                                                                                                  | 109.4                                                                                            |
| 85.52                                                                                                                   | 85.2                                                                                                                   | 85.6                                                                                             |
| 63.81                                                                                                                   | 63.5                                                                                                                   | 63.7                                                                                             |
| 52.94                                                                                                                   | 52.7                                                                                                                   | 52.7                                                                                             |
| 37.40                                                                                                                   | 37.1                                                                                                                   | 37.4                                                                                             |
| 36.06                                                                                                                   | 35.8                                                                                                                   | 35.9                                                                                             |

**Total Synthesis of (+)-Folicanthine [(+)-2b]:**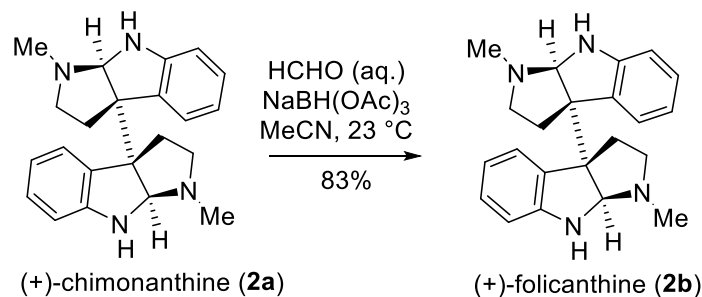

An over-dried round-bottom flask was charged with (+)-chimonanthine [(+)-**2a**] (45.0 mg, 0.13 mmol, 1.0 equiv.) in acetonitrile (5 ml). To this solution was added formalin (37% aqueous solution, 47  $\mu\text{L}$ , 1.17 mmol, 5.0 equiv.) at room temperature and stirred for 5 minutes. Next, sodium triacetoxyborohydride (140 mg, 0.66 mmol, 5.2 equiv.) was added at the same temperature and stirring was continued until the complete consumption of the starting material (judged by running TLC). After 30 minutes of stirring, a solution of methanol (1:19) in dichloromethane (saturated with ammonia) was added slowly to the reaction mixture. After 5 minutes of stirring, the resulting slurry was concentrated under reduced pressure and the residue was purified by flash column chromatography (1% MeOH in  $\text{CH}_2\text{Cl}_2$  saturated with ammonia) to afford (+)-folicanthine [(+)-**2b**] as a white solid.

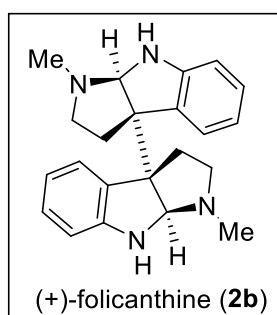

**(3aR,3'aR,8aR,8'aR)-1,1'-Dimethyl-2,2',3,3',8,8a,8',8'a-octahydro-1H,1'H-3a,3'a-**

**bipyrrolo[2,3-*b*]indole (**2b**):** (+)-Folicanthine [(+)-**2b**] was obtained as white solid (mp: 187-190  $^\circ\text{C}$ ) (37 mg of product, 83% yield);  $R_f$  = 0.42 (5 % MeOH in  $\text{CH}_2\text{Cl}_2$  saturated with  $\text{NH}_3$ ).

**<sup>1</sup>H NMR** (500 MHz, CDCl<sub>3</sub>) δ 7.07 – 6.89 (dd,  $J = 7.5$  Hz, 4H), 6.53 (t,  $J = 7.6$  Hz, 2H), 6.29 (d,  $J = 7.8$  Hz, 2H), 4.71 (s, 2H), 3.02 (s, 6H), 2.83 (m, 2H), 2.50 – 2.42 (m, 10H), 2.05 – 1.99 (m, 2H).

**<sup>13</sup>C NMR** (125 MHz, CDCl<sub>3</sub>) δ 152.9, 128.2, 128.1, 126.9, 116.6, 105.8, 91.9, 62.6, 52.5, 37.0, 35.2.

**IR** (film)  $\nu_{\text{max}}$ : 3128, 2908, 1689, 1508, 1177, 798 cm<sup>-1</sup>.

**HRMS** (ESI-TOF)  $m/z$ : [M+H]<sup>+</sup> Calcd for [C<sub>24</sub>H<sub>30</sub>N<sub>4</sub> + H]<sup>+</sup> 375.2543; Found 375.2565.

$[\alpha]_{\text{D}}^{24.0} = +215.13$  ( $c = 0.70$ , MeOH) for (+)-folicanthine (**2a**) [lit.<sup>1</sup>  $[\alpha]_{\text{D}}^{24.0} = +207$  ( $c = 0.75$ , MeOH)]

Following a similar procedure as described for (+)-Folicanthine [(+)-**2b**], the total synthesis of (–)-Folicanthine [(–)-**2b**] was accomplished.

$[\alpha]_{\text{D}}^{24.0} = -251.54$  ( $c = 1.0$ , EtOH) for (–)-Folicanthine [(–)-**2b**].

**Comparison of NMR Data of (+)-Folicanthine [(+)-**2b**]** of this report with literature of (+)-(**2b**) prepared independently by Movassaghi<sup>1</sup> and Kanai.<sup>2</sup>

**Comparison of <sup>1</sup>H-NMR Data:**

| Movassaghi's report of (+)-folicanthine ( <b>2b</b> )           |     |   |              |
|-----------------------------------------------------------------|-----|---|--------------|
| ( <sup>1</sup> H-NMR, 500 MHz, CDCl <sub>3</sub> ) <sup>1</sup> |     |   |              |
| 6.98                                                            | 2H  | t | $J = 7.5$ Hz |
| 6.94                                                            | 2H  | d | $J = 6.5$ Hz |
| 6.51                                                            | 2H  | t | $J = 7.0$ Hz |
| 6.27                                                            | 2H  | d | $J = 7.5$ Hz |
| 4.37                                                            | 2H  | s | -            |
| 3.00                                                            | 6H  | s | -            |
| 2.64 – 2.62                                                     | 2H  | m | -            |
| 2.50 – 2.41                                                     | 10H | m | -            |
| 1.99 – 1.95                                                     | 2H  | m | -            |

| Matsunaga's report (+)-folicanthine ( <b>2b</b> )    |      |       |                           |
|------------------------------------------------------|------|-------|---------------------------|
| $(^1\text{H-NMR}, 500 \text{ MHz}, \text{CDCl}_3)^2$ |      |       |                           |
| $\delta$ (ppm)                                       | Int. | mult. | $J$ (Hz)                  |
| 7.00 – 6.90                                          | 4H   | m     | -                         |
| 6.50                                                 | 2H   | dd    | $J = 7.3, 7.3 \text{ Hz}$ |
| 6.26                                                 | 2H   | d     | $J = 8.0 \text{ Hz}$      |
| 4.36                                                 | 2H   | s     | -                         |
| 2.99                                                 | 6H   | s     | -                         |
| 2.64                                                 | 2H   | m     | -                         |
| 2.50 – 2.38                                          | 10H  | m     | -                         |
| 2.50 – 2.38                                          | 2H   | m     | -                         |
| 2.00 – 1.92                                          | 2H   | m     | -                         |

| This report (+)-folicanthine ( <b>2b</b> )           |     |    |                      |
|------------------------------------------------------|-----|----|----------------------|
| $(^1\text{H-NMR}, 400 \text{ MHz}, \text{CDCl}_3)^1$ |     |    |                      |
| 7.07 – 6.89                                          | 4H  | dd | $J = 7.5 \text{ Hz}$ |
| 6.53                                                 | 2H  | t  | $J = 7.6 \text{ Hz}$ |
| 6.29                                                 | 2H  | d  | $J = 7.8 \text{ Hz}$ |
| 6.27                                                 | 2H  | d  | $J = 7.5 \text{ Hz}$ |
| 4.71                                                 | 2H  | s  | -                    |
| 3.02                                                 | 6H  | s  | -                    |
| 2.83                                                 | 2H  | m  | -                    |
| 2.50 – 2.42                                          | 10H | m  | -                    |
| 2.05 – 1.99                                          | 2H  | m  | -                    |

**Comparison of  $^{13}\text{C}$ -NMR Data:**

| Movassaghi's report of (+)-Folicanthine [(+)- <b>2b</b> ] ( $^{13}\text{C}$ -NMR, 125 MHz, $\text{CDCl}_3$ ) <sup>1</sup> | Matsunaga's report of (+)-Folicanthine [(+)- <b>2b</b> ] ( $^{13}\text{C}$ -NMR, 125 MHz, $\text{CDCl}_3$ ) <sup>2</sup> | This report: (+)-Folicanthine [(+)- <b>2b</b> ] ( $^{13}\text{C}$ -NMR, 125 MHz, $\text{CDCl}_3$ ) |
|---------------------------------------------------------------------------------------------------------------------------|--------------------------------------------------------------------------------------------------------------------------|----------------------------------------------------------------------------------------------------|
| 153.21                                                                                                                    | 152.9                                                                                                                    | 152.9                                                                                              |
| 133.16                                                                                                                    | 132.8                                                                                                                    | 128.2                                                                                              |
| 128.29                                                                                                                    | 128.0                                                                                                                    | 128.1                                                                                              |
| 123.95                                                                                                                    | 123.7                                                                                                                    | 126.9                                                                                              |
| 116.85                                                                                                                    | 116.6                                                                                                                    | 116.6                                                                                              |
| 106.05                                                                                                                    | 105.8                                                                                                                    | 105.8                                                                                              |
| 92.34                                                                                                                     | 92.0                                                                                                                     | 91.9                                                                                               |
| 63.00                                                                                                                     | 62.7                                                                                                                     | 62.6                                                                                               |
| 52.94                                                                                                                     | 52.7                                                                                                                     | 52.5                                                                                               |
| 38.25                                                                                                                     | 37.9                                                                                                                     | 37.0                                                                                               |
| 35.58                                                                                                                     | 35.2                                                                                                                     | 35.2                                                                                               |

**Total Synthesis of (–)-Calycanthine (1):**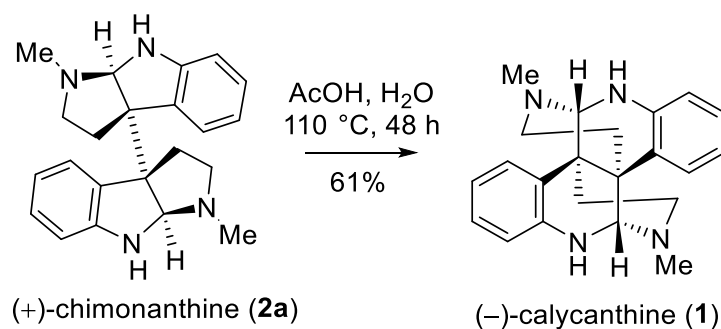

A sealed tube was charged with (+)-chimonanthine (**2a**) (40.0 mg, 0.115 mmol, 1.0 equiv.) in a mixture (1:1) of acetic acid in water (2.5 mL) under an atmosphere of nitrogen and heated to 110 °C. Upon completion of the reaction (48 h), as monitored by running TLC, the reaction mixture was cooled to room temperature and partitioned between dichloromethane (10 mL)

and saturated aqueous sodium bicarbonate (10 mL). The layers were separated, and the aqueous layer was extracted with dichloromethane (10 mL X 2). The combined organic extracts were dried over anhydrous sodium sulfate, filtered, and were concentrated under the reduced pressure to afford a brown residue. The residue was purified by flash column chromatography (1% methanol in dichloromethane saturated with ammonia) to afford (–)-Calycanthine [(–)-**1**].

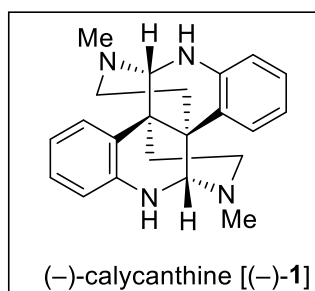

**(4b*R*,5*S*,10b*R*,11*S*)-13,18-dimethyl-5,6,11,12-tetrahydro-5,10b:11,4b-bis(epiminoethano) dibenzo[*c,h*][2,6]naphthyridine (3):** (–)-Calycanthine [(–)-**1**] was obtained as white solid (mp: 228-229 °C) (24 mg of product, 61% yield);  $R_f$  = 0.49 (5% MeOH in CH<sub>2</sub>Cl<sub>2</sub> saturated with NH<sub>3</sub>).

**<sup>1</sup>H NMR** (500 MHz, CDCl<sub>3</sub>)  $\delta$  7.05 (d,  $J$  = 8.4 Hz, 2H), 6.82 (d,  $J$  = 7.5 Hz, 2H), 6.51 (d,  $J$  = 7.7 Hz, 2H), 6.29 (d,  $J$  = 7.8 Hz, 2H), 4.57 (d,  $J$  = 12.1 Hz, 2H), 4.32 (s, 2H), 3.15 (td,  $J$  = 13.5, 5.7 Hz, 2H), 2.63 (dd,  $J$  = 11.7, 5.1 Hz, 1H), 2.43 (s, 6H), 2.24 (dd,  $J$  = 7.8, 4.9 Hz, 2H), 1.28 (d,  $J$  = 7.4 Hz, 2H).

**<sup>13</sup>C NMR** (125 MHz, CDCl<sub>3</sub>)  $\delta$  145.5, 126.6, 125.1, 124.5, 116.4, 112.1, 71.1, 46.2, 42.7, 36.1, 31.8.

**<sup>1</sup>H NMR** (400 MHz, DMSO-*d*<sub>6</sub>)  $\delta$  6.94 (d,  $J$  = 7.5 Hz, 2H), 6.81 (t,  $J$  = 7.5 Hz, 2H), 6.57 (d,  $J$  = 20.0 Hz, 2H), 6.43 (t,  $J$  = 7.4 Hz, 2H), 4.16 (d,  $J$  = 4.1 Hz, 2H), 3.27 (s, 2H), 2.11 (s, 6H), 2.02 – 1.87 (m, 4H), 0.98 – 0.88 (m, 2H).

**<sup>13</sup>C NMR** (100 MHz, DMSO-*d*<sub>6</sub>)  $\delta$  145.9, 127.0, 126.2, 124.3, 115.9, 111.5, 69.8, 46.1, 42.5, 36.3, 34.3.

**IR** (film) $\nu_{\text{max}}$ : 3425, 2913, 1656, 1623, 1495, 1109, 785 cm<sup>–1</sup>.

**HRMS** (ESI-TOF)  $m/z$ :  $[M+H]^+$  Calcd for  $[C_{22}H_{26}N_4 + H]^+$  347.2230; Found 347.2244.

$[\alpha]_D^{24.0} = -617.82$  ( $c = 0.20$ , EtOH) for (–)-Calycanthine [(–)-**1**] [lit.<sup>1</sup>  $[\alpha]_D^{24.0} = -612$  ( $c = 0.18$ , EtOH)]

Following a similar procedure as described for (–)-Calycanthine [(–)-**1**], the total synthesis of (+)-Calycanthine [(+)-**1**] was accomplished.

$[\alpha]_D^{24.0} = +646.25$  ( $c = 1.0$ ,  $CHCl_3$ ) for (+)-Calycanthine [(+)-**1**] [lit.<sup>3</sup>  $[\alpha]_D^{24.0} = +675$  ( $c = 1.0$ ,  $CHCl_3$ )].

**Comparison of NMR Data of (–)-Calycanthine [(–)-**1**]** of this report with literature by Movassaghi *et. al.*<sup>1</sup> and Kanai *et. al.*<sup>2</sup>

**Comparison of  $^1H$ -NMR Data:**

| Movassaghi's report of (–)-Calycanthine [(–)- <b>1</b> ] |    |       |                            |
|----------------------------------------------------------|----|-------|----------------------------|
| $(^1H\text{-NMR, } 500 \text{ MHz, } CDCl_3)^1$          |    |       |                            |
| 7.01                                                     | 2H | d     | $J = 7.5 \text{ Hz}$       |
| 6.82                                                     | 2H | app t | $J = 7.5 \text{ Hz}$       |
| 6.55                                                     | 2H | t     | $J = 7.5 \text{ Hz}$       |
| 6.27                                                     | 2H | d     | $J = 8.0 \text{ Hz}$       |
| 4.58                                                     | 2H | br s  | -                          |
| 4.32                                                     | 2H | s     | -                          |
| 3.13                                                     | 2H | td    | $J = 13.3, 5.3 \text{ Hz}$ |
| 2.62                                                     | 2H | dd    | $J = 11.3, 5.3 \text{ Hz}$ |
| 2.42                                                     | 6H | s     | -                          |
| 2.27                                                     | 2H | dt    | $J = 12.5, 3.6 \text{ Hz}$ |
| 1.29                                                     | 2H | dd    | $J = 13.3, 3.8 \text{ Hz}$ |

| Matsunaga's report of (–)-Calycanthine [(–)- <b>1</b> ]       |    |      |                              |
|---------------------------------------------------------------|----|------|------------------------------|
| <sup>1</sup> H-NMR, 500 MHz, CDCl <sub>3</sub> ) <sup>1</sup> |    |      |                              |
| 7.00                                                          | 2H | d    | <i>J</i> = 7.5 Hz            |
| 6.80                                                          | 2H | dd   | <i>J</i> = 7.7, 7.7 Hz       |
| 6.53                                                          | 2H | dd   | <i>J</i> = 7.7, 7.7 Hz       |
| 6.26                                                          | 2H | d    | <i>J</i> = 7.7 Hz            |
| 4.55                                                          | 2H | br d | <i>J</i> = 4.0 Hz            |
| 4.30                                                          | 2H | d    | <i>J</i> = 4.0 Hz            |
| 3.12                                                          | 2H | ddd  | <i>J</i> = 13.2, 4.0, 4.0 Hz |
| 2.60                                                          | 2H | ddd  | <i>J</i> = 11.6, 4.0, 4.0 Hz |
| 2.40                                                          | 6H | s    | -                            |
| 2.26                                                          | 2H | ddd  | <i>J</i> = 11.6, 4.0, 4.0 Hz |
| 1.29                                                          | 2H | m    | -                            |

| This report: (–)-Calycanthine [(–)- <b>1</b> ]   |    |    |                              |
|--------------------------------------------------|----|----|------------------------------|
| <sup>1</sup> H-NMR, 500 MHz, CDCl <sub>3</sub> ) |    |    |                              |
| 7.05                                             | 2H | d  | <i>J</i> = 8.4 Hz            |
| 6.82                                             | 2H | dd | <i>J</i> = 7.5 Hz            |
| 6.51                                             | 2H | d  | <i>J</i> = 7.7 Hz            |
| 6.29                                             | 2H | d  | <i>J</i> = 7.8 Hz            |
| 4.57                                             | 2H | d  | <i>J</i> = 12.1 Hz           |
| 4.32                                             | 2H | s  | -                            |
| 3.15                                             | 2H | td | <i>J</i> = 13.5, 5.7 Hz      |
| 2.63                                             | 2H | dd | <i>J</i> = 11.7, 5.1, 4.0 Hz |
| 2.43                                             | 6H | s  | -                            |
| 2.24                                             | 2H | dd | <i>J</i> = 7.8, 4.9 Hz       |
| 1.28                                             | 2H | d  | <i>J</i> = 7.4 Hz            |

**Comparison of  $^{13}\text{C}$ -NMR Data:**

| Movassaghi's report of (–)-<br>Calycanthine [(–)- <b>1</b> ] ( $^{13}\text{C}$ -<br>NMR, 125 MHz, $\text{CDCl}_3$ ) <sup>1</sup> | Matsunaga's report of (–)-<br>Calycanthine [(–)- <b>1</b> ] ( $^{13}\text{C}$ -<br>NMR, 125 MHz, $\text{CDCl}_3$ ) <sup>2</sup> | This report: (–)-<br>Calycanthine [(–)- <b>1</b> ] ( $^{13}\text{C}$ -<br>NMR, 125 MHz, $\text{CDCl}_3$ ) |
|----------------------------------------------------------------------------------------------------------------------------------|---------------------------------------------------------------------------------------------------------------------------------|-----------------------------------------------------------------------------------------------------------|
| 145.56                                                                                                                           | 145.7                                                                                                                           | 145.5                                                                                                     |
| 126.72                                                                                                                           | 126.8                                                                                                                           | 126.6                                                                                                     |
| 125.21                                                                                                                           | 125.4                                                                                                                           | 125.1                                                                                                     |
| 124.61                                                                                                                           | 124.6                                                                                                                           | 124.5                                                                                                     |
| 116.51                                                                                                                           | 116.6                                                                                                                           | 116.4                                                                                                     |
| 112.18                                                                                                                           | 112.3                                                                                                                           | 112.1                                                                                                     |
| 71.20                                                                                                                            | 71.3                                                                                                                            | 71.1                                                                                                      |
| 46.72                                                                                                                            | 46.8                                                                                                                            | 46.2                                                                                                      |
| 42.78                                                                                                                            | 42.8                                                                                                                            | 42.7                                                                                                      |
| 36.13                                                                                                                            | 36.2                                                                                                                            | 36.1                                                                                                      |
| 31.90                                                                                                                            | 32.0                                                                                                                            | 31.8                                                                                                      |

**References:**

- 1) M. Movassaghi, and M. A. Schmidt, *Angew. Chem. Int. Ed.* 2007, **46**, 3725–3728.
- 2) H. Mitsunuma, M. Shibasaki, M. Kanai, and S. Matsunaga *Angew. Chem. Int. Ed.* 2012, **51**, 5217–5221.
- 3) R. K. Duke, R. D. Allan, G. A. R. Johnston, K. N. Mewett and D. Mitrovic, *J. Nat. Prod.* 1995, **58**, 1200–1208.

## Spectral Data

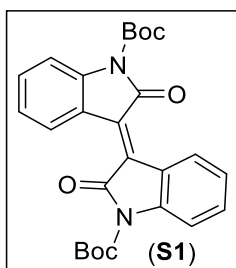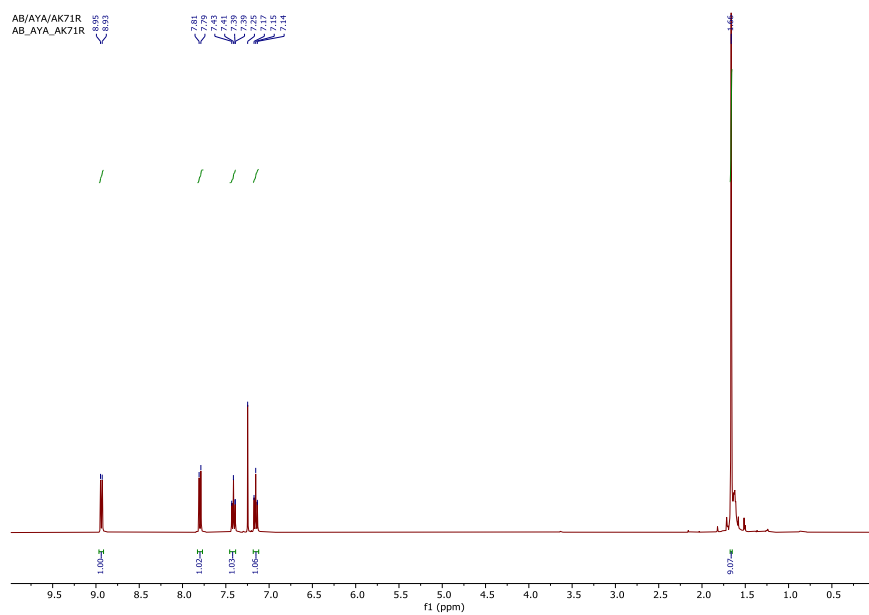

$^1\text{H}$  NMR (400 MHz,  $\text{CDCl}_3$ ) of **S1**

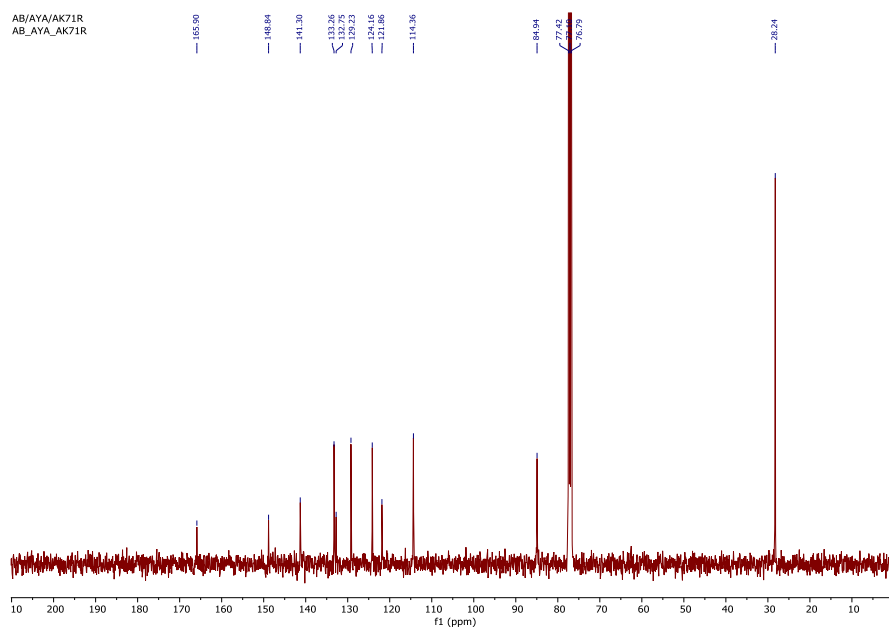

$^{13}\text{C}$  NMR (100 MHz,  $\text{CDCl}_3$ ) of **S1**

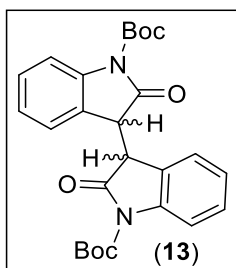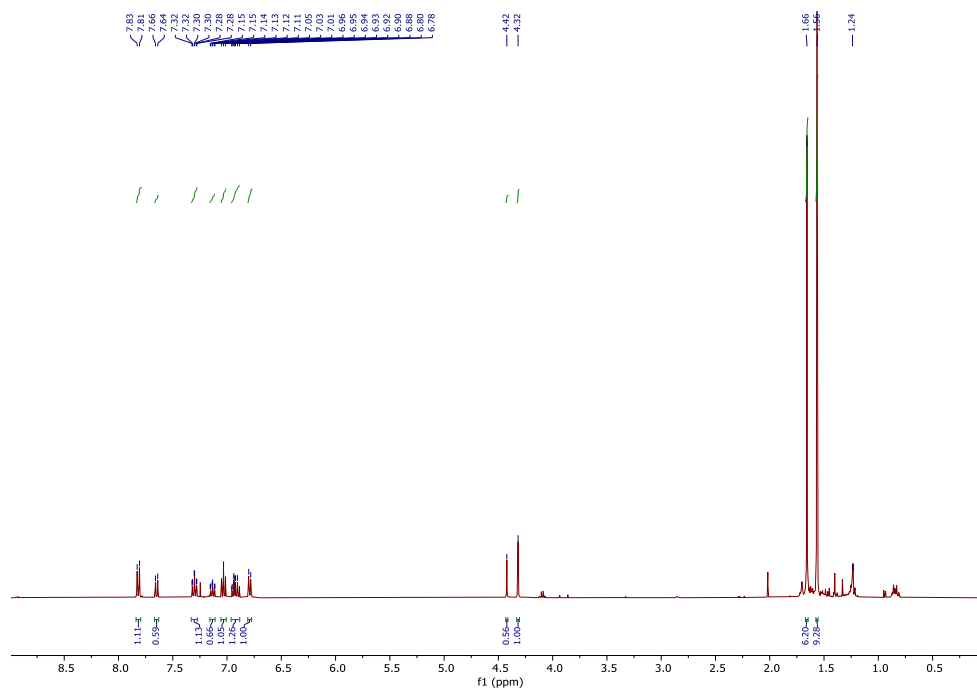

<sup>1</sup>H NMR (400 MHz, CDCl<sub>3</sub>) of **13**

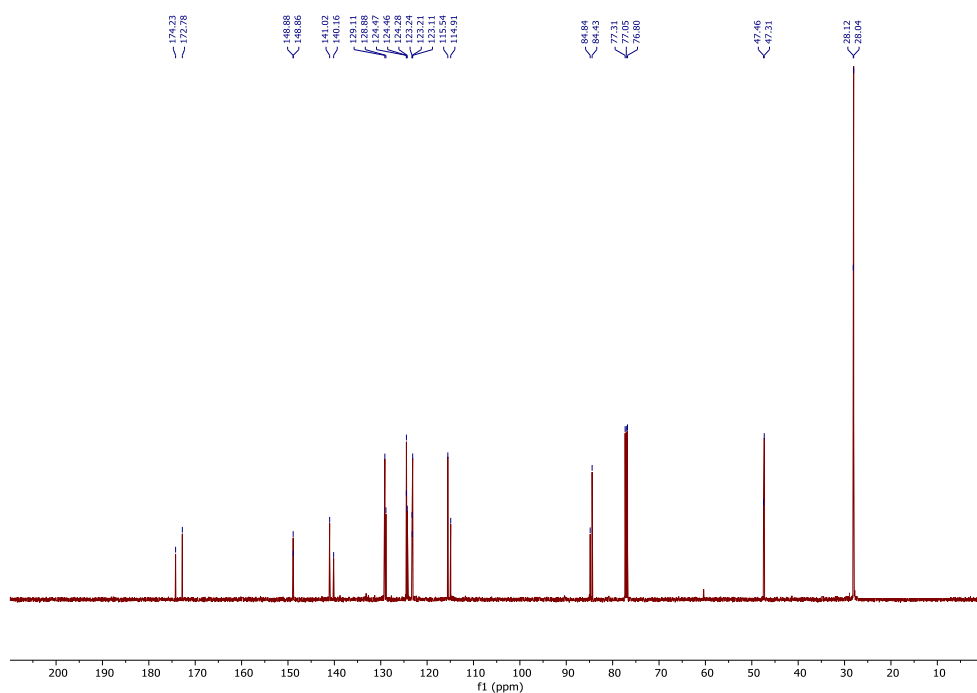

<sup>13</sup>C NMR (100 MHz, CDCl<sub>3</sub>) of **10d**

## Display Report

## Analysis Info

Analysis Name D:\Data\User data\2021\AUGUST\AB\_AK\_242.d  
Method Tune\_pos\_Standard.m  
Sample Name AB\_AK\_242  
Comment

Acquisition Date 8/24/2021 12:56:54 PM  
Operator IISER Kolkata  
Instrument maXis impact 8282001.00127

## Acquisition Parameter

|             |          |                      |          |                  |           |
|-------------|----------|----------------------|----------|------------------|-----------|
| Source Type | ESI      | Ion Polarity         | Positive | Set Nebulizer    | 0.5 Bar   |
| Focus       | Active   | Set Capillary        | 3400 V   | Set Dry Heater   | 200 °C    |
| Scan Begin  | 50 m/z   | Set End Plate Offset | -500 V   | Set Dry Gas      | 4.0 l/min |
| Scan End    | 1000 m/z | Set Charging Voltage | 2000 V   | Set Divert Valve | Source    |
|             |          | Set Corona           | 0 nA     | Set APCI Heater  | 0 °C      |

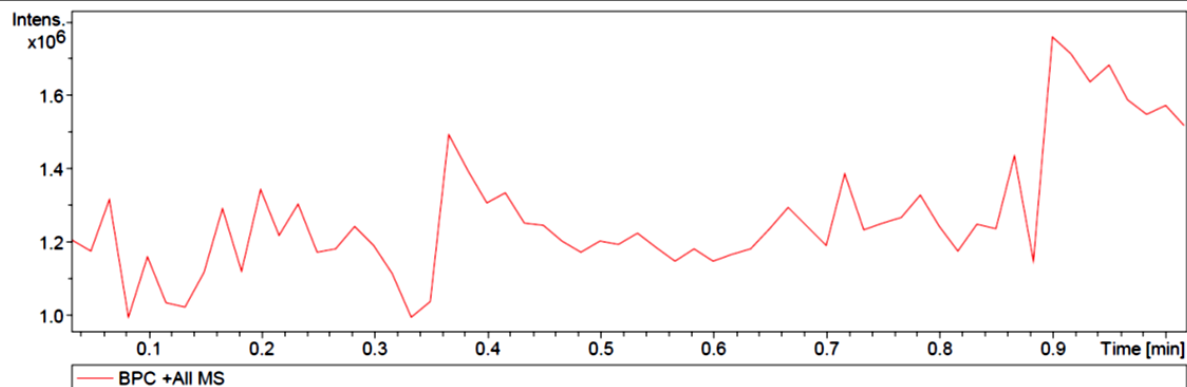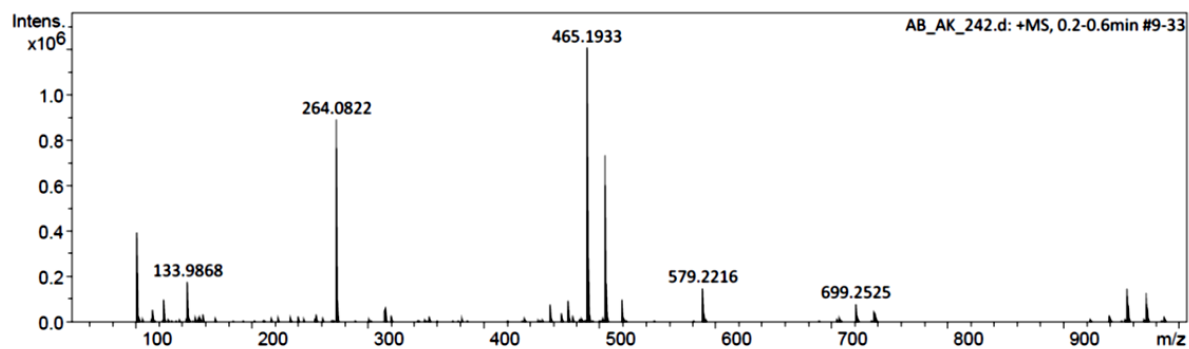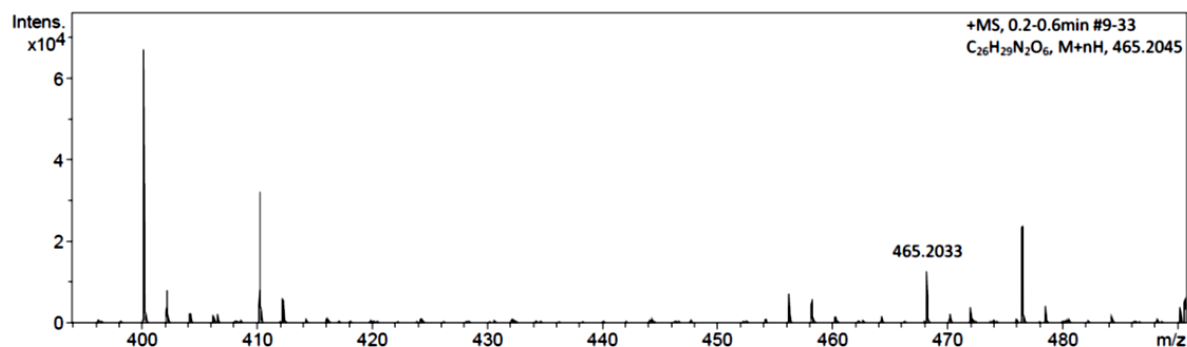

AB\_AK\_242.d

Bruker Compass DataAnalysis 4.1

printed: 8/24/2021 1:01:51 PM

by: IISER Kolkata

Page 1 of 1

HRMS of 10d

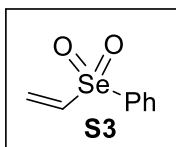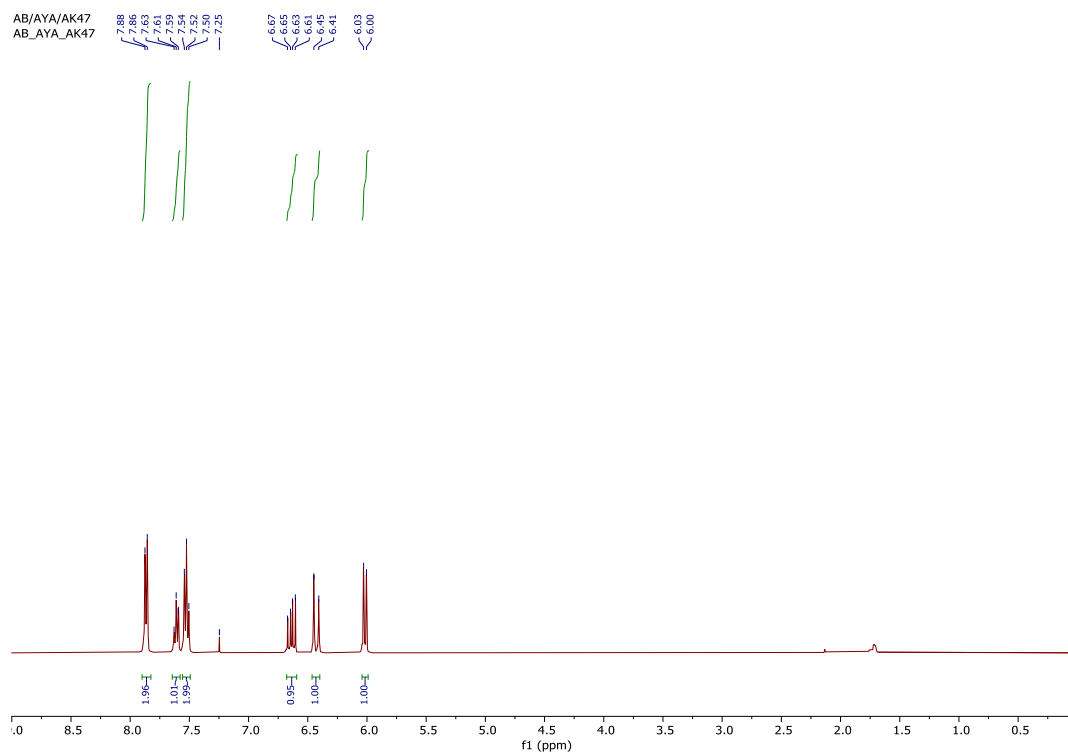**<sup>1</sup>H NMR (400 MHz, CDCl<sub>3</sub>) of S3**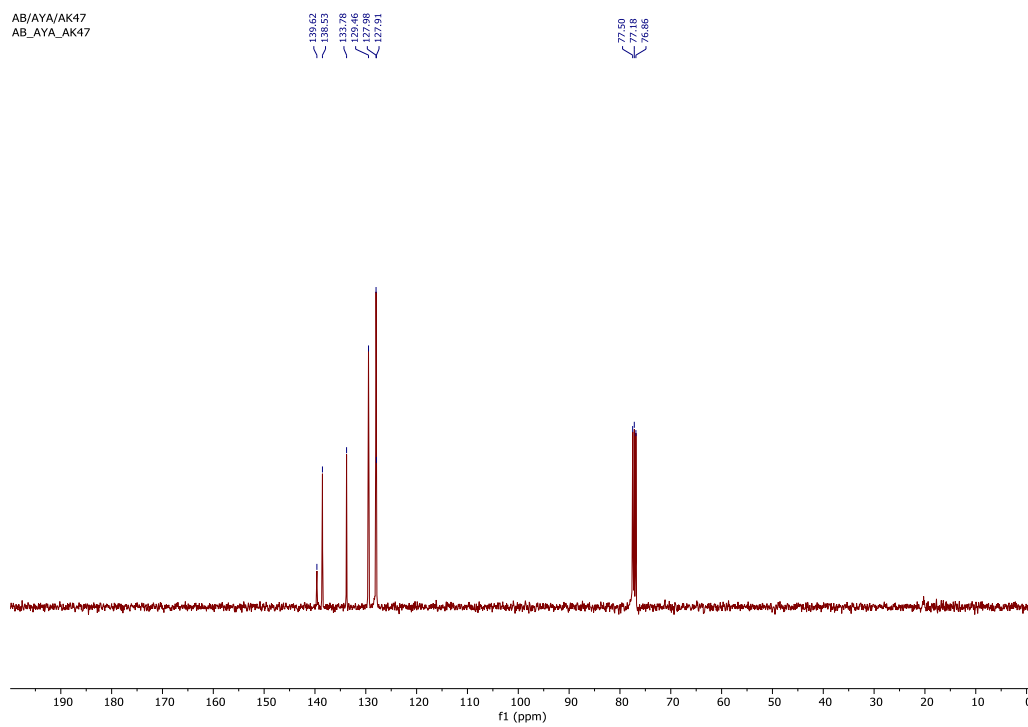**<sup>13</sup>C NMR (100 MHz, CDCl<sub>3</sub>) of S3**

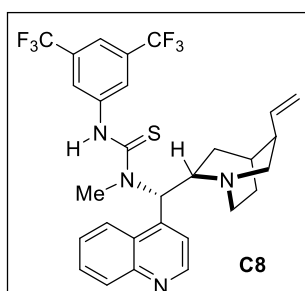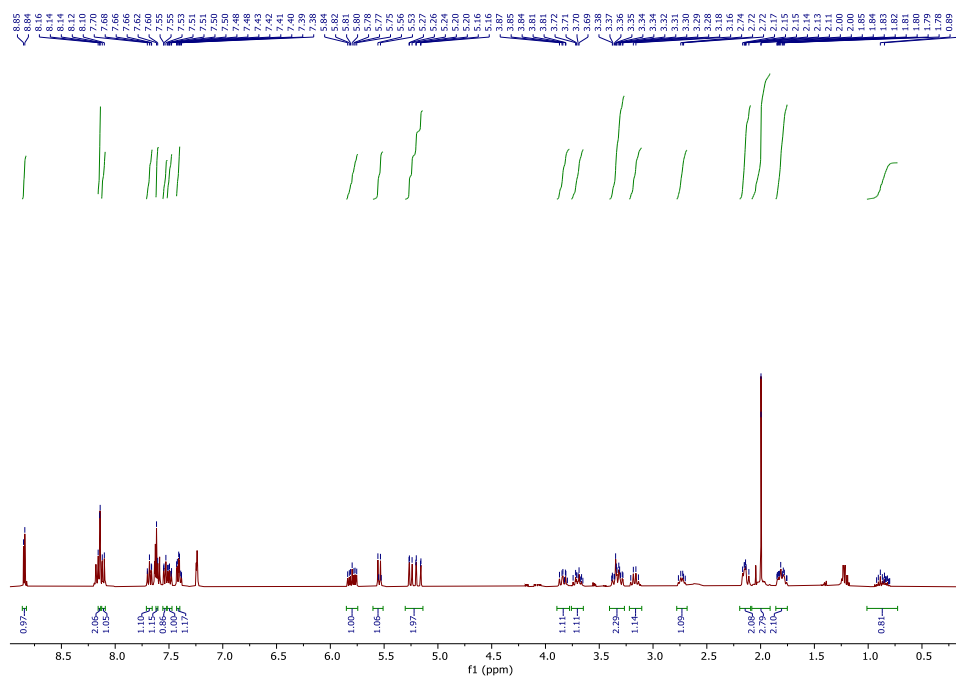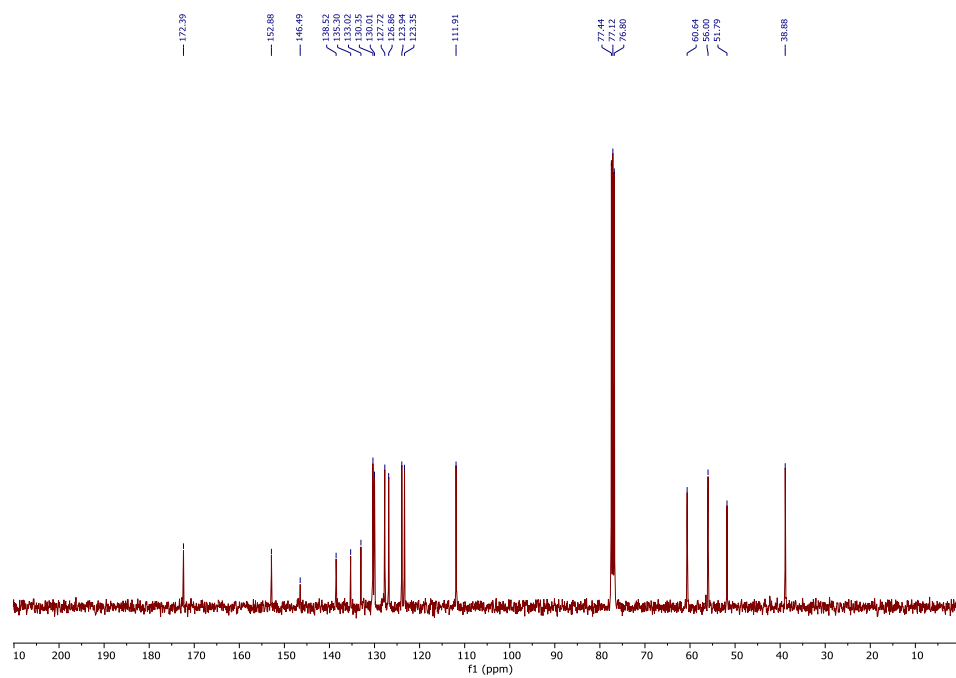

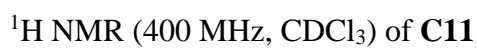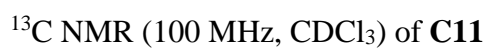

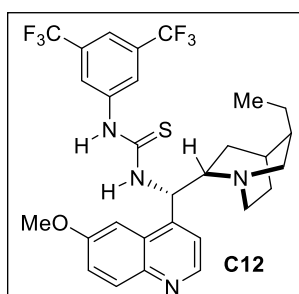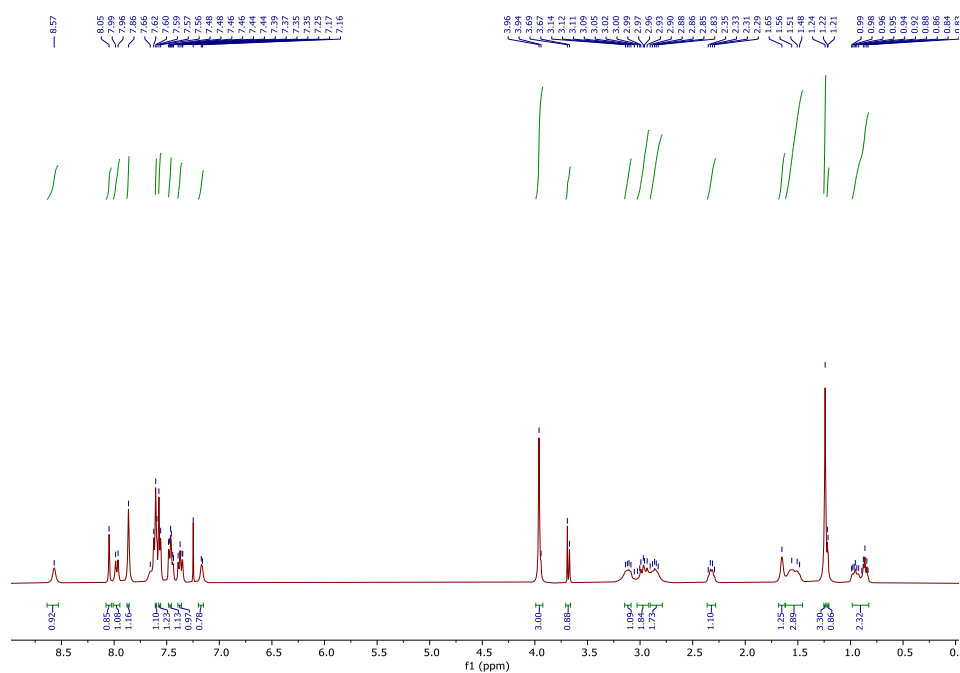<sup>1</sup>H NMR (400 MHz, CDCl<sub>3</sub>) of **C12**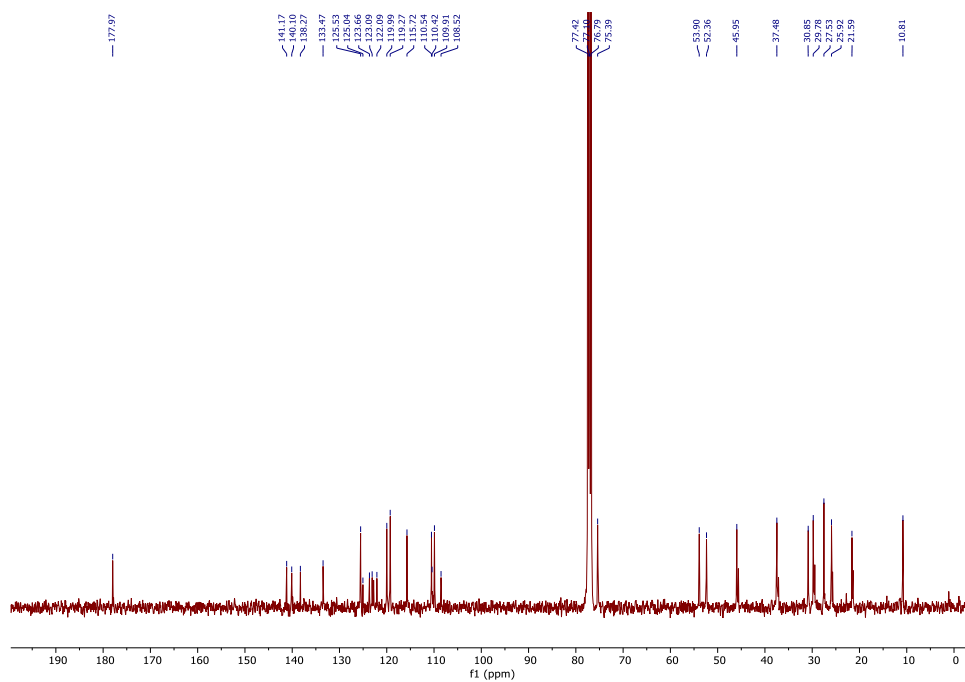<sup>13</sup>C NMR (100 MHz, CDCl<sub>3</sub>) of **C12**

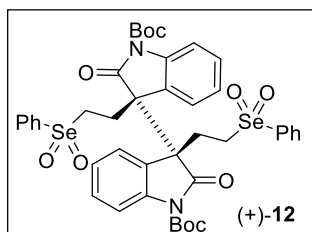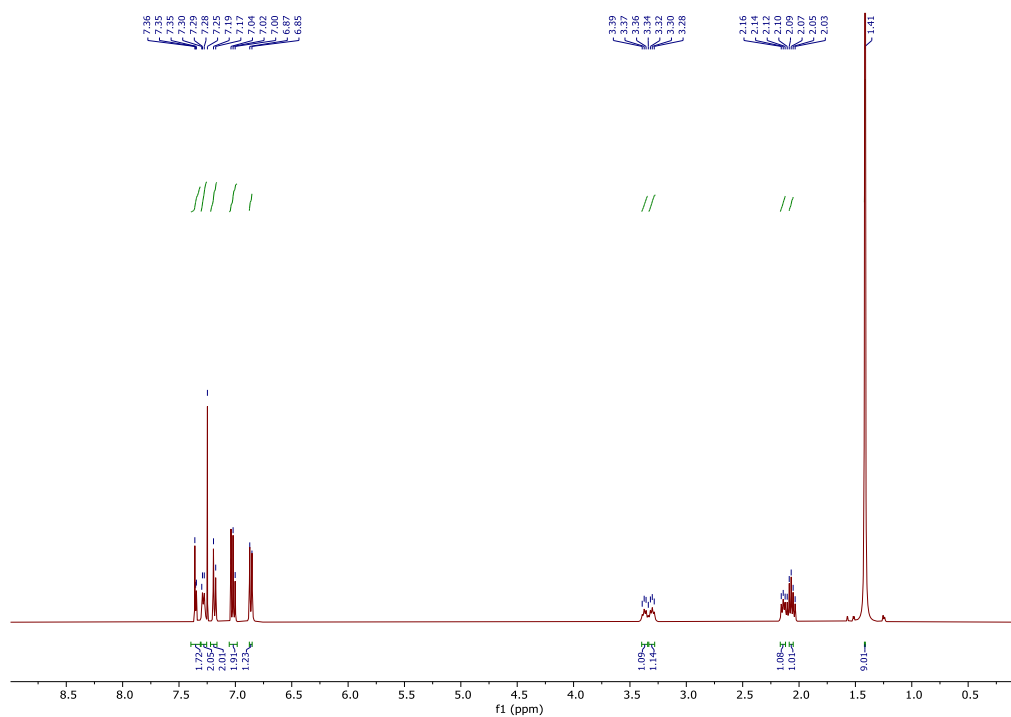

$^1\text{H}$  NMR (400 MHz,  $\text{CDCl}_3$ ) of (+)-12

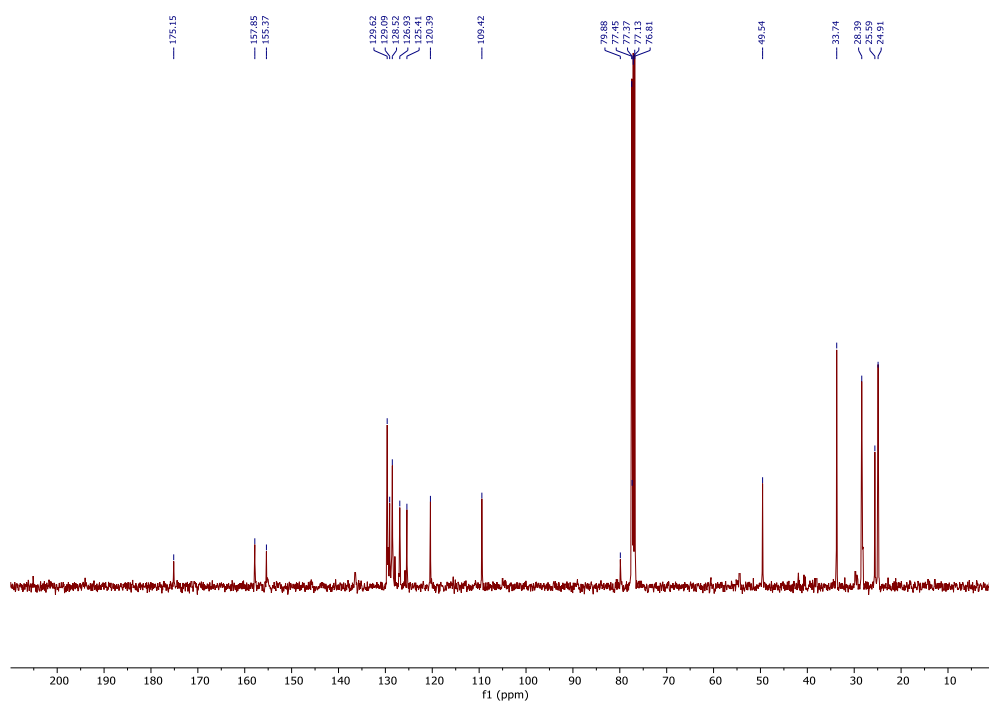

$^{13}\text{C}$  NMR (100 MHz,  $\text{CDCl}_3$ ) of (+)-12

## Display Report

## Analysis Info

Analysis Name D:\Data\User data\2021\MARCH\AB\_AK\_165.d  
Method Tune\_pos\_Mid.m  
Sample Name AB\_AK\_165  
Comment

Acquisition Date 3/9/2021 12:44:42 PM  
Operator IISER Kolkata  
Instrument maXis impact 8282001.00127

## Acquisition Parameter

|             |          |                      |          |                  |           |
|-------------|----------|----------------------|----------|------------------|-----------|
| Source Type | ESI      | Ion Polarity         | Positive | Set Nebulizer    | 0.4 Bar   |
| Focus       | Active   | Set Capillary        | 3400 V   | Set Dry Heater   | 200 °C    |
| Scan Begin  | 50 m/z   | Set End Plate Offset | -500 V   | Set Dry Gas      | 4.0 l/min |
| Scan End    | 3000 m/z | Set Charging Voltage | 2000 V   | Set Divert Valve | Source    |
|             |          | Set Corona           | 0 nA     | Set APCI Heater  | 0 °C      |

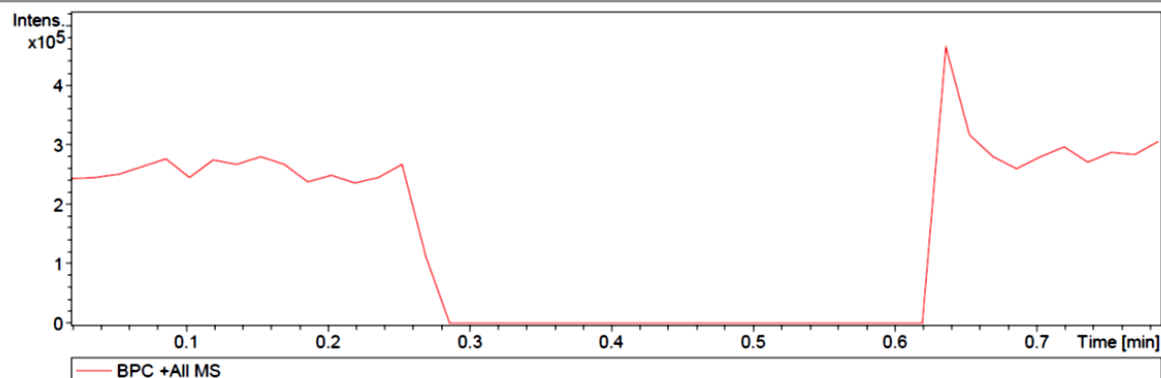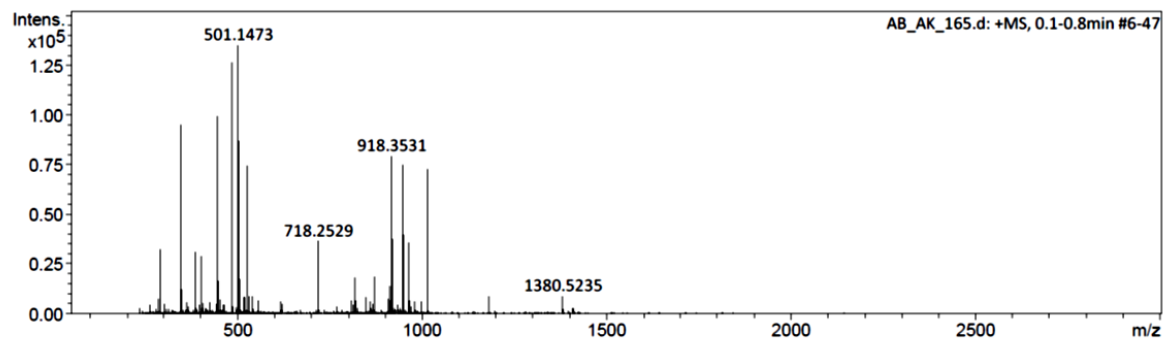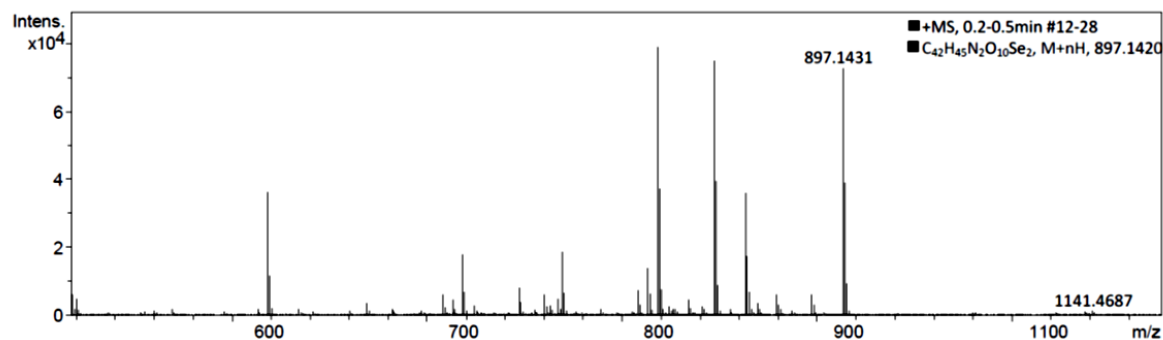

AB\_AK\_165.d

Bruker Compass DataAnalysis 4.1

printed: 3/9/2021 12:46:03 PM

by: IISER Kolkata

Page 1 of 1

HRMS of (+)-12

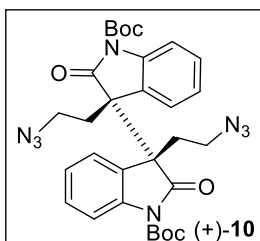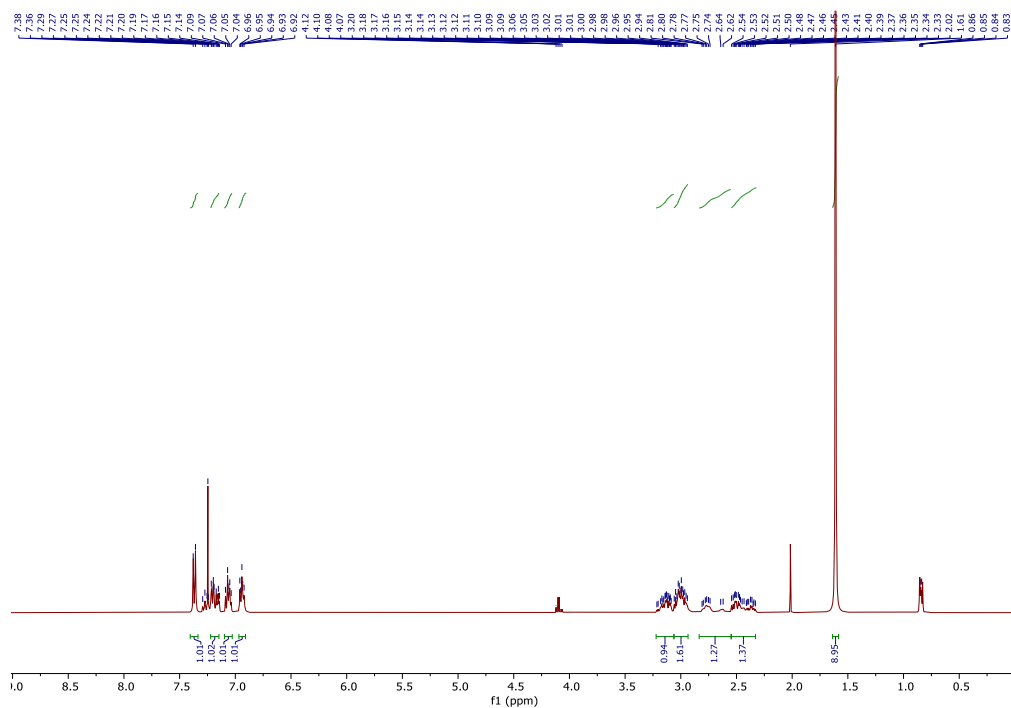<sup>1</sup>H NMR (400 MHz, CDCl<sub>3</sub>) of (+)-**10**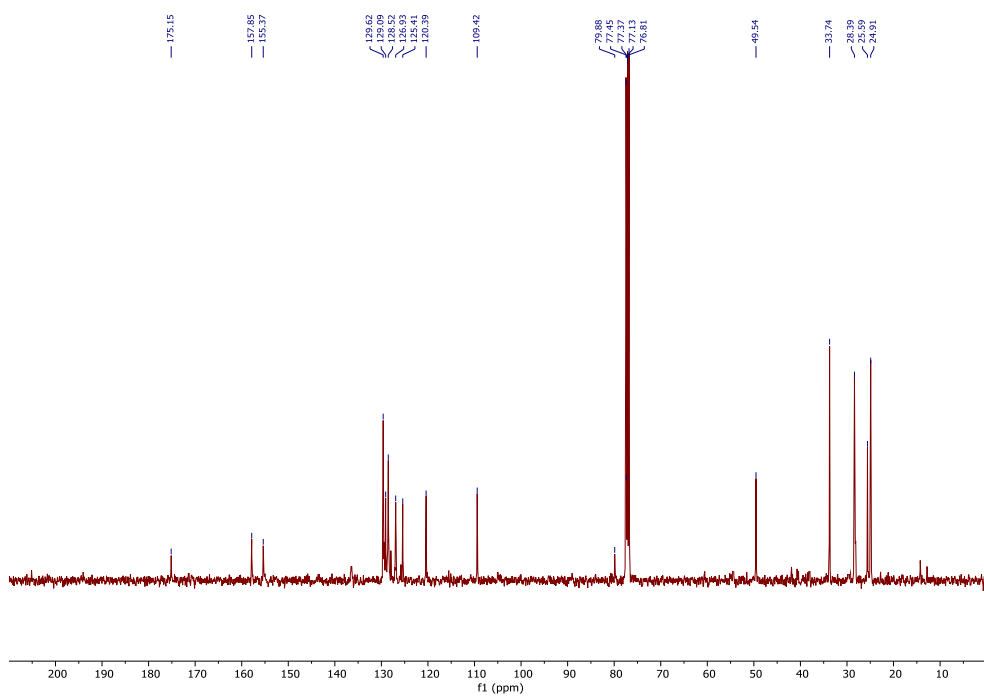 $^{13}\text{C}$  NMR (100 MHz,  $\text{CDCl}_3$ ) of (+)-**10**

## Display Report

### Analysis Info

Analysis Name D:\Data\User data\2021\AUGUST\AB\_AK\_PNS\_01219.d  
Method Tune\_pos\_Standard.m  
Sample Name AB\_AK\_PNS\_01219  
Comment

Acquisition Date 8/27/2021 12:35:01 PM

Operator IISER Kolkata  
Instrument maXis impact 8282001.00127

### Acquisition Parameter

|             |          |                      |          |                  |           |
|-------------|----------|----------------------|----------|------------------|-----------|
| Source Type | ESI      | Ion Polarity         | Positive | Set Nebulizer    | 0.5 Bar   |
| Focus       | Active   | Set Capillary        | 3400 V   | Set Dry Heater   | 200 °C    |
| Scan Begin  | 50 m/z   | Set End Plate Offset | -500 V   | Set Dry Gas      | 4.0 l/min |
| Scan End    | 1000 m/z | Set Charging Voltage | 2000 V   | Set Divert Valve | Source    |
|             |          | Set Corona           | 0 nA     | Set APCI Heater  | 0 °C      |

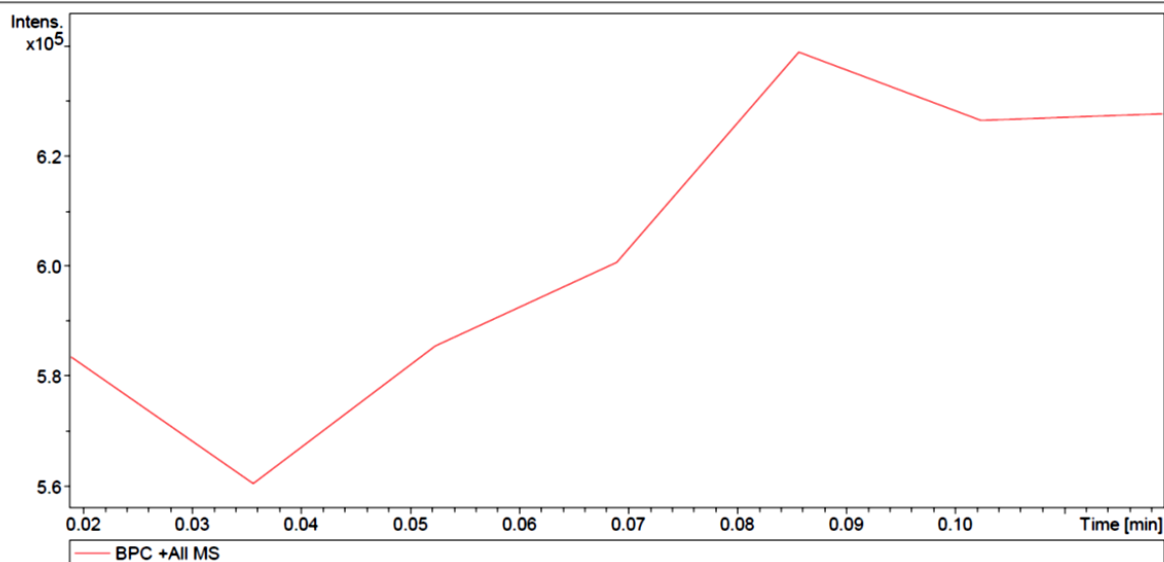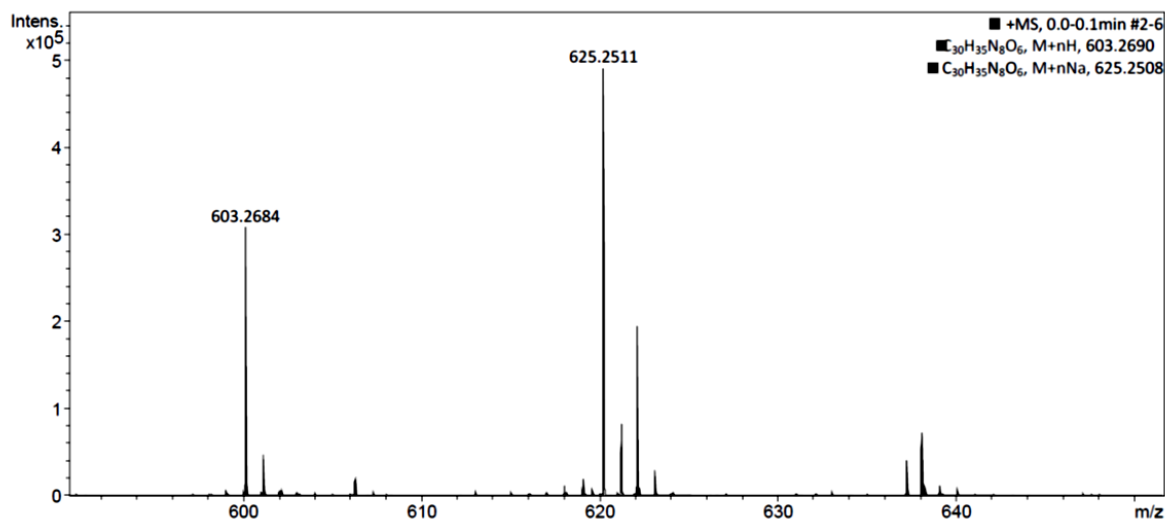

AB\_AK\_PNS\_01219.d

Bruker Compass DataAnalysis 4.1

printed: 8/27/2021 12:37:28 PM

by: IISER Kolkata

Page 1 of 1

HRMS of (+)-10

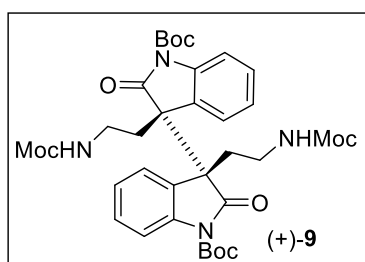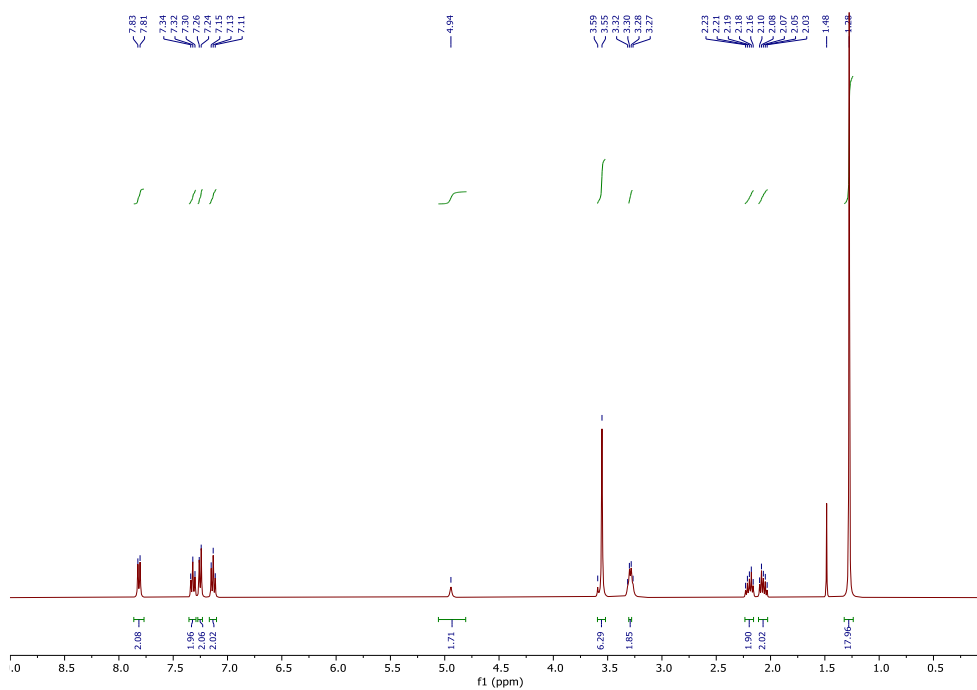

$^1\text{H}$  NMR (400 MHz,  $\text{CDCl}_3$ ) of (+)-9

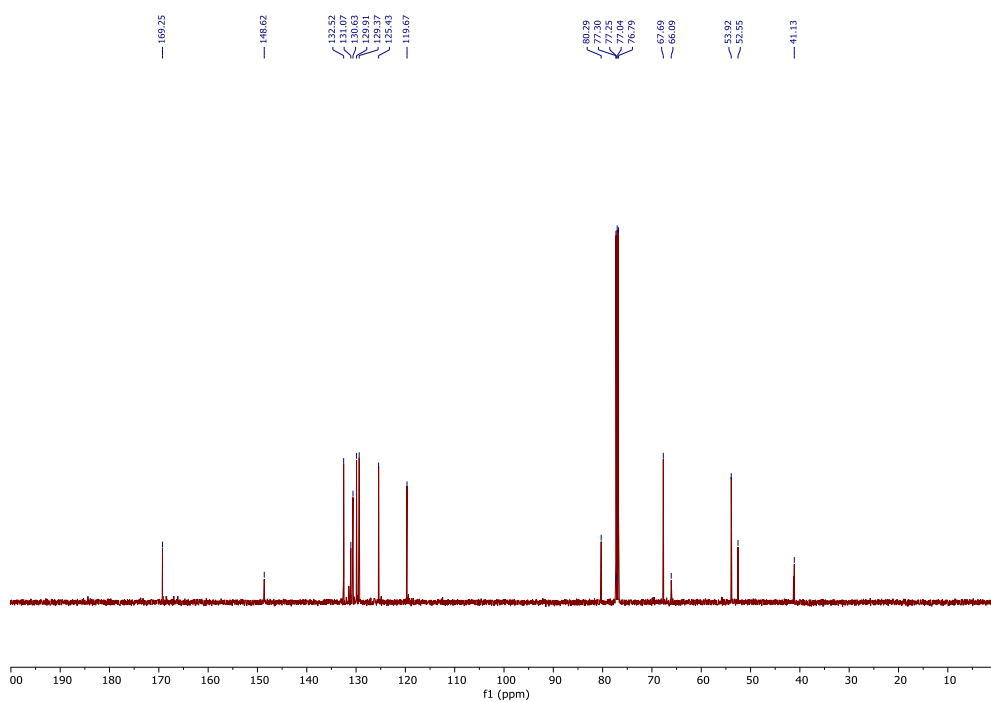

$^{13}\text{C}$  NMR (100 MHz,  $\text{CDCl}_3$ ) of (+)-9

## Display Report

### Analysis Info

Analysis Name D:\Data\User data\2021\NOV\AB\_AK\_389.d  
Method Tune\_pos\_Standard.m  
Sample Name AB\_AK\_389  
Comment

Acquisition Date 11/1/2021 11:18:39 AM

Operator IISER Kolkata  
Instrument maXis impact 8282001.00127

### Acquisition Parameter

|             |          |                      |          |                  |           |
|-------------|----------|----------------------|----------|------------------|-----------|
| Source Type | ESI      | Ion Polarity         | Positive | Set Nebulizer    | 0.5 Bar   |
| Focus       | Active   | Set Capillary        | 3400 V   | Set Dry Heater   | 200 °C    |
| Scan Begin  | 50 m/z   | Set End Plate Offset | -500 V   | Set Dry Gas      | 4.0 l/min |
| Scan End    | 1000 m/z | Set Charging Voltage | 2000 V   | Set Divert Valve | Source    |
|             |          | Set Corona           | 0 nA     | Set APCI Heater  | 0 °C      |

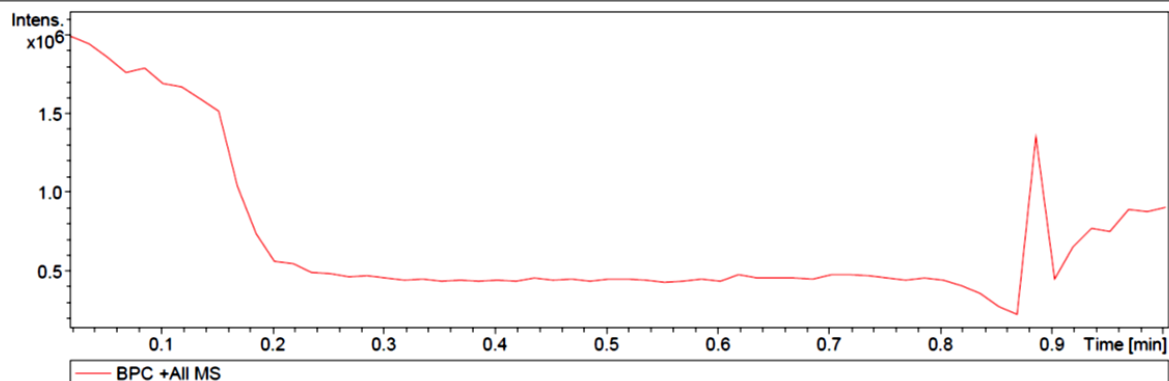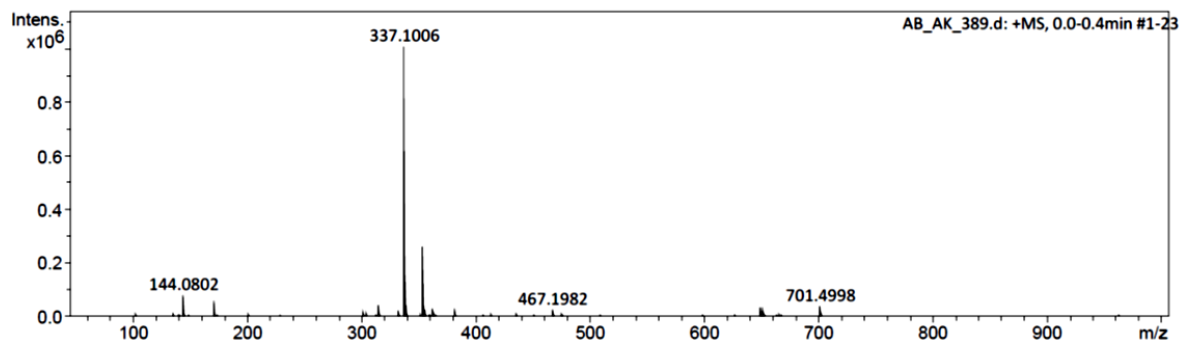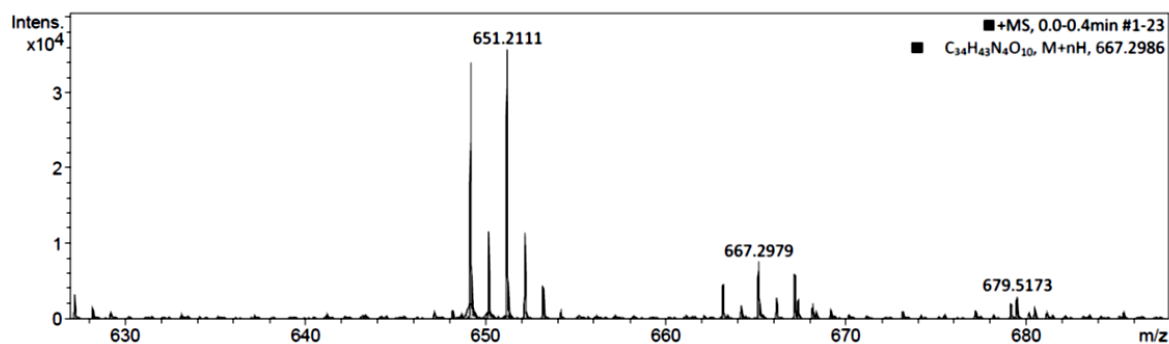

AB\_AK\_389.d

Bruker Compass DataAnalysis 4.1

printed: 11/1/2021 11:25:14 AM

by: IISER Kolkata

Page 1 of 1

HRMS of (+)-9

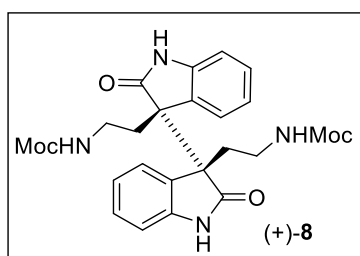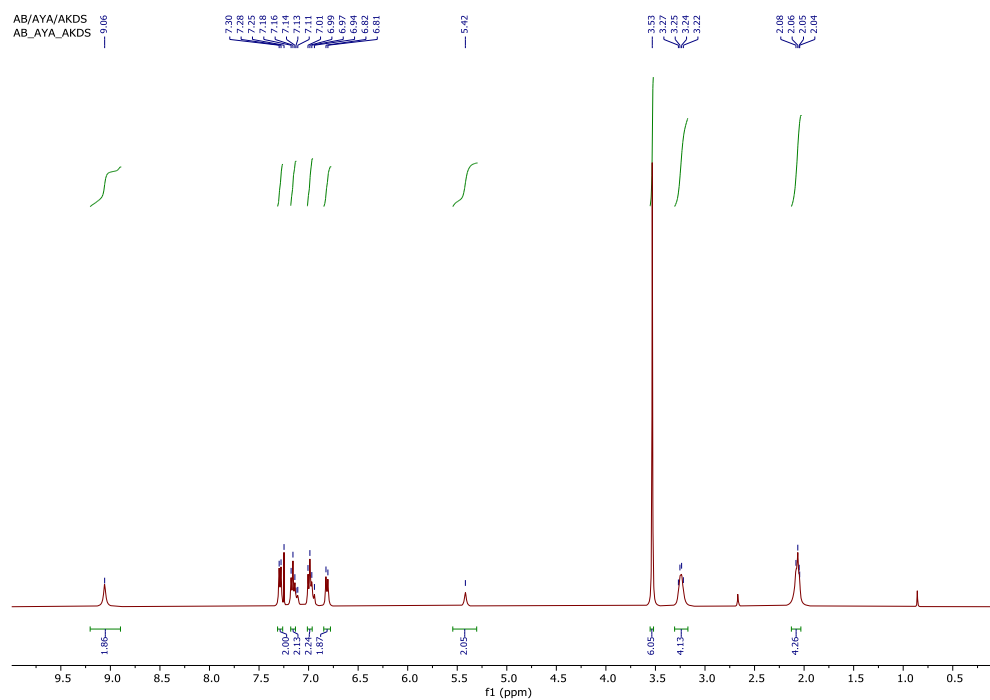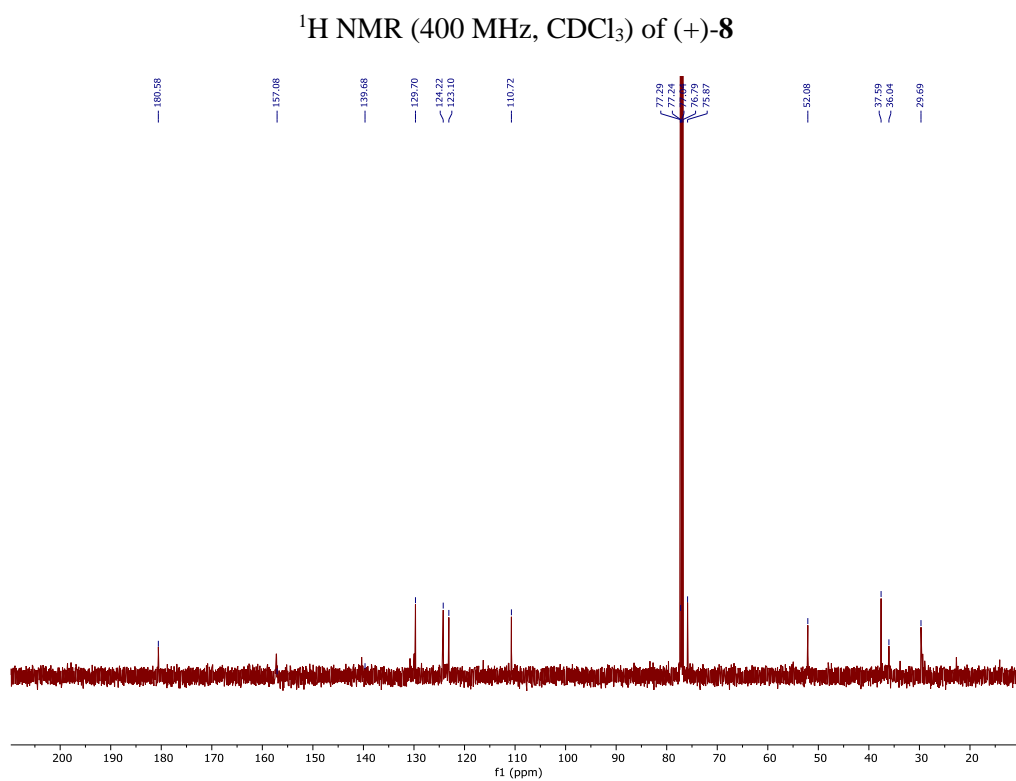

## Display Report

### Analysis Info

Analysis Name D:\Data\User\_data\2021\OCTOBER\AB\_AK\_338.d  
Method Tune\_pos\_Standard.m  
Sample Name AB\_AK\_338  
Comment SIGNAL DROPPIN WHILE WASHING WITH MEOH

Acquisition Date 10/4/2021 11:49:24 AM

Operator IISER Kolkata  
Instrument maXis impact 8282001.00127

### Acquisition Parameter

|             |          |                      |          |                  |           |
|-------------|----------|----------------------|----------|------------------|-----------|
| Source Type | ESI      | Ion Polarity         | Positive | Set Nebulizer    | 0.5 Bar   |
| Focus       | Active   | Set Capillary        | 3400 V   | Set Dry Heater   | 200 °C    |
| Scan Begin  | 50 m/z   | Set End Plate Offset | -500 V   | Set Dry Gas      | 4.0 l/min |
| Scan End    | 1000 m/z | Set Charging Voltage | 2000 V   | Set Divert Valve | Source    |
|             |          | Set Corona           | 0 nA     | Set APCI Heater  | 0 °C      |

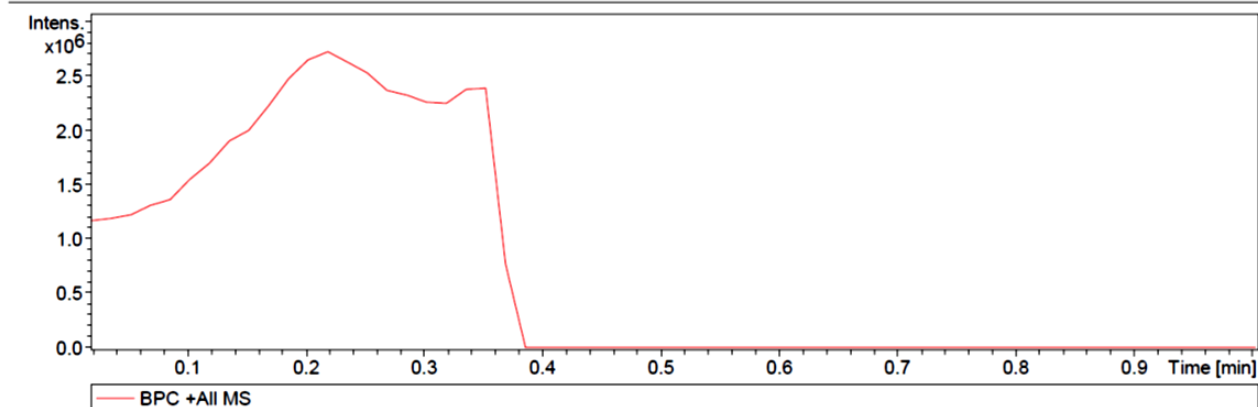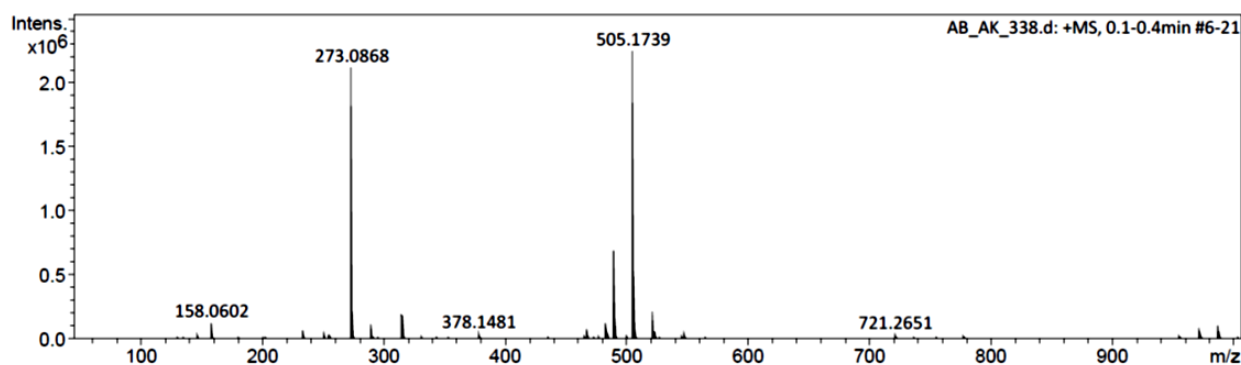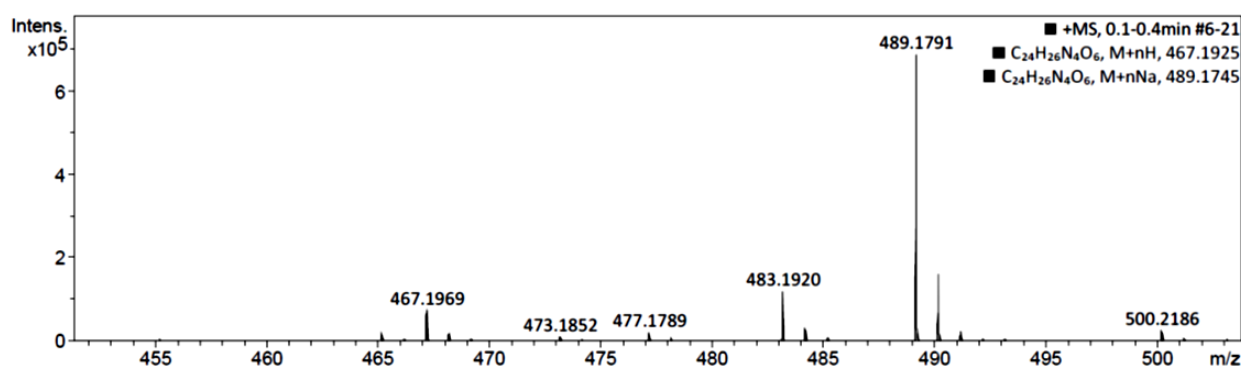

AB\_AK\_338.d

Bruker Compass DataAnalysis 4.1

printed: 10/4/2021 11:58:32 AM

by: IISER Kolkata

Page 1 of 1

HRMS of (+)-8

## Peak Summary Report

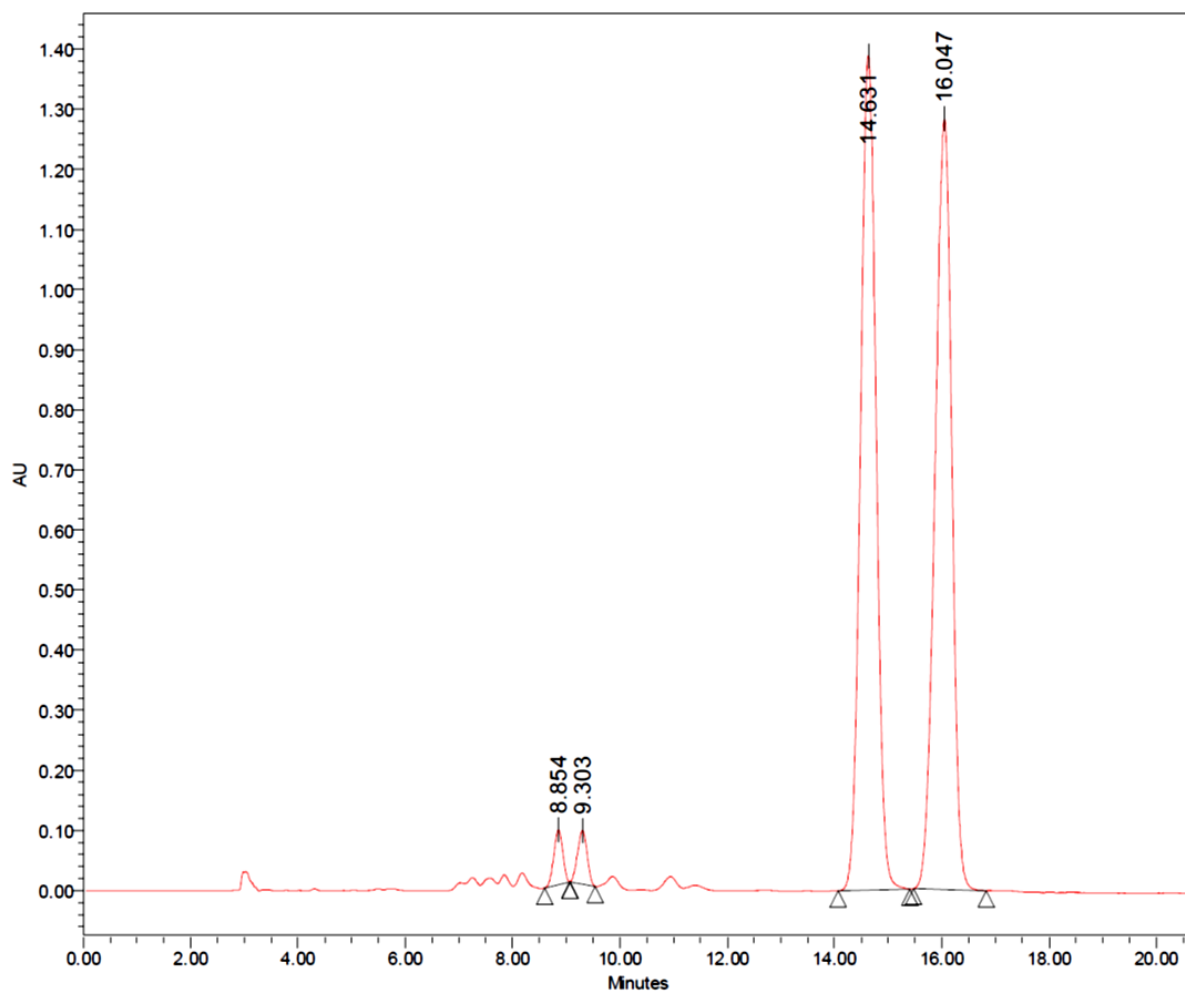

— Sample Name: AB\_AK\_NHMoc\_IA-10-1-rac; Date Acquired: 18-03-2021 19:17:41 IST; Vial: 1; Injection:

## Peak Summary with Statistics

Name:

|   | Sample Name             | Vial | Inj | Retention Time (min) | Area     | % Area | Height  |
|---|-------------------------|------|-----|----------------------|----------|--------|---------|
| 1 | AB_AK_NHMoc_IA-10-1-rac | 1    | 1   | 8.854                | 1066128  | 1.84   | 91223   |
| 2 | AB_AK_NHMoc_IA-10-1-rac | 1    | 1   | 16.047               | 27778392 | 47.99  | 1281813 |
| 3 | AB_AK_NHMoc_IA-10-1-rac | 1    | 1   | 14.631               | 27923303 | 48.24  | 1387564 |
| 4 | AB_AK_NHMoc_IA-10-1-rac | 1    | 1   | 9.303                | 1120173  | 1.94   | 89221   |

Reported by User: System  
 Report Method: Peak Summary Report  
 Report Method ID 1009  
 Page: 1 of 2

Project Name: AB Research Group  
 Date Printed:  
 18-03-2021  
 22:27:05 Asia/Calcutta

HPLC data of (±)-8

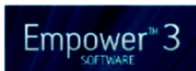

## Peak Summary Report

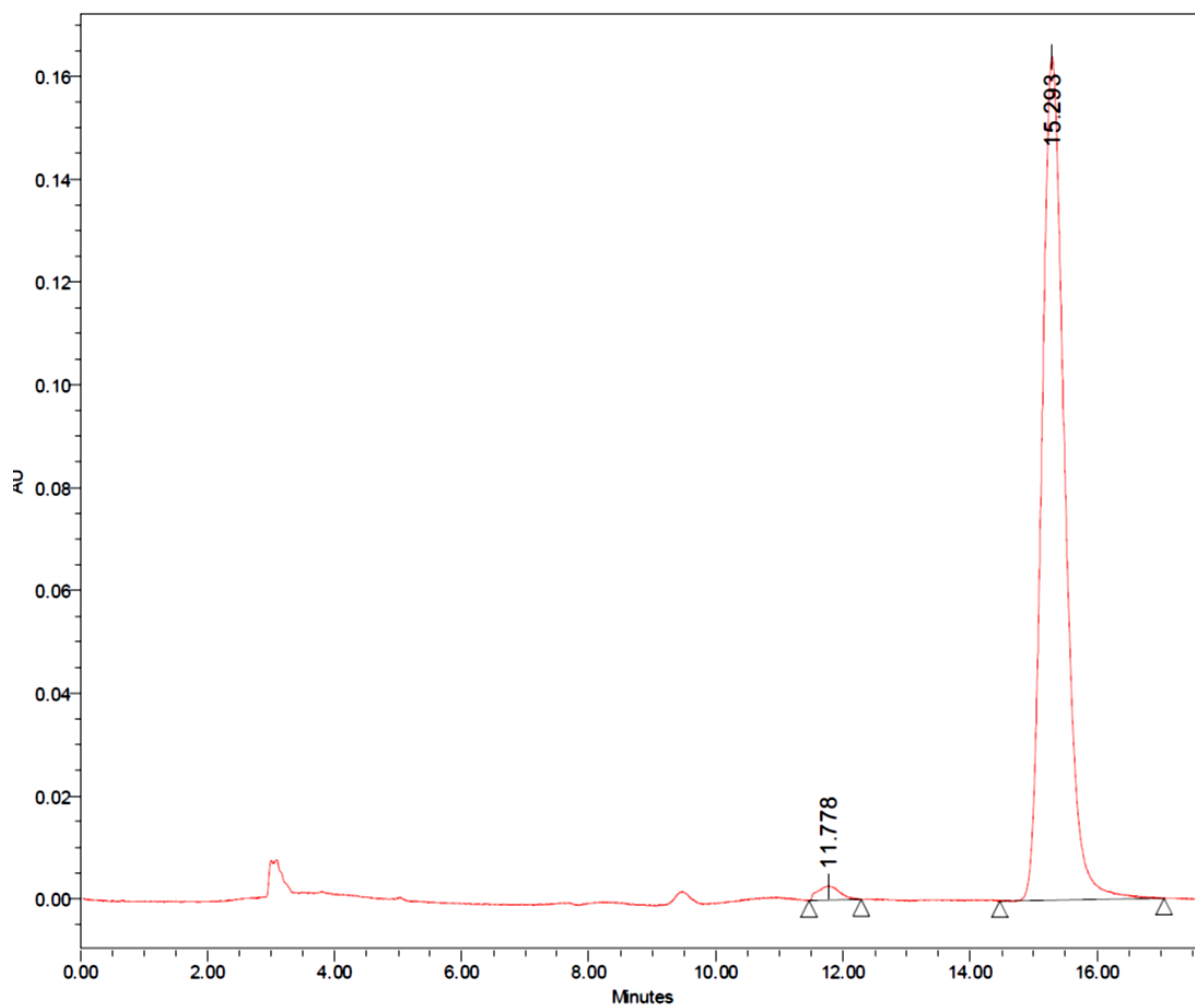

— Sample Name: AB\_AK\_C/MeCN\_IA-10-1; Date Acquired: 25-03-2021 22:57:45 IST; Vial: 1; Injection:

### Peak Summary with Statistics

Name:

|           | Sample Name          | Vial | Inj | Retention Time (min) | Area    | % Area | Height |
|-----------|----------------------|------|-----|----------------------|---------|--------|--------|
| 1         | AB_AK_C/MeCN_IA-10-1 | 1    | 1   | 15.293               | 4073856 | 98.41  | 164093 |
| 2         | AB_AK_C/MeCN_IA-10-1 | 1    | 1   | 11.778               | 65950   | 1.59   | 2765   |
| Mean      |                      |      |     | 13.536               |         |        |        |
| Std. Dev. |                      |      |     | 2.486                |         |        |        |

Reported by User: System  
 Report Method: Peak Summary Report  
 Report Method ID 1009  
 Page: 1 of 2

Project Name: AB Research Group  
 Date Printed:  
 25-03-2021  
 23:17:58 Asia/Calcutta

HPLC data of (+)-**8**

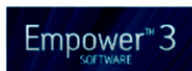

## Peak Summary Report

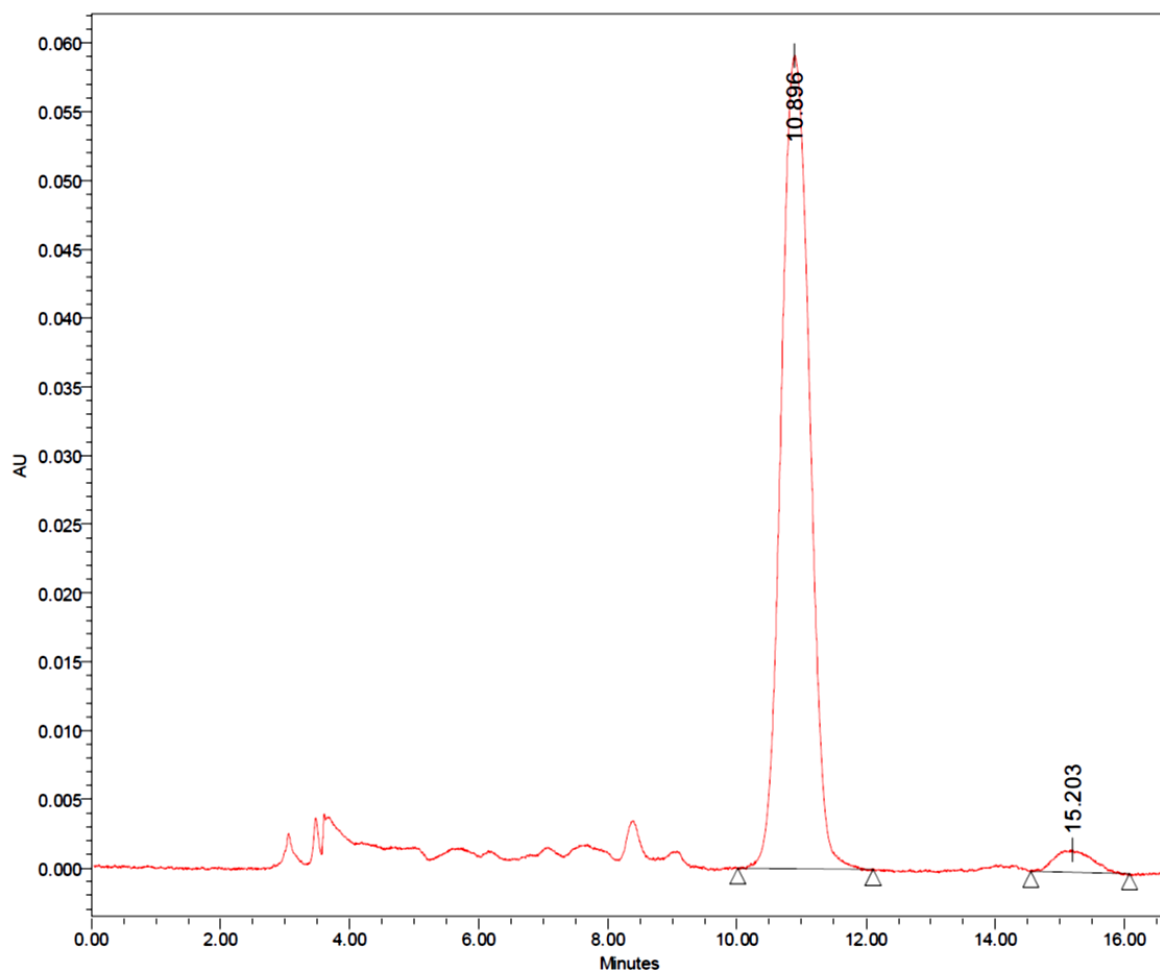

— Sample Name: AB\_AK\_QD/PhMe\_IA-10-1; Date Acquired: 26-03-2021 01:53:04 IST; Vial: 1; Injection: .

### Peak Summary with Statistics

Name:

|           | Sample Name           | Vial | Inj | Retention Time (min) | Area    | % Area | Height |
|-----------|-----------------------|------|-----|----------------------|---------|--------|--------|
| 1         | AB_AK_QD/PhMe_IA-10-1 | 1    | 4   | 15.203               | 65121   | 3.46   | 1614   |
| 2         | AB_AK_QD/PhMe_IA-10-1 | 1    | 4   | 10.896               | 1819348 | 96.54  | 59154  |
| Mean      |                       |      |     | 13.049               |         |        |        |
| Std. Dev. |                       |      |     | 3.046                |         |        |        |

Reported by User: System  
 Report Method: Peak Summary Report  
 Report Method ID 1009  
 Page: 1 of 2

Project Name: AB Research Group  
 Date Printed:  
 13-12-2021  
 14:22:44 Asia/Calcutta

HPLC data of (-)-8

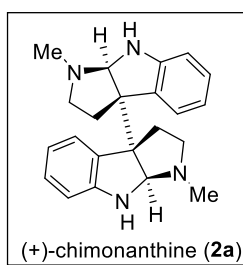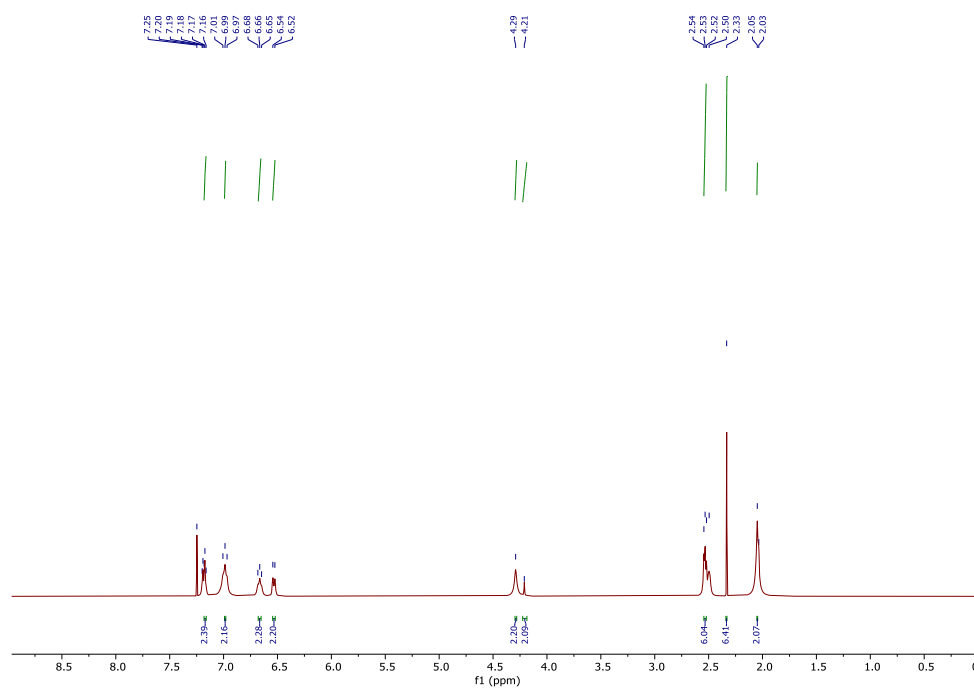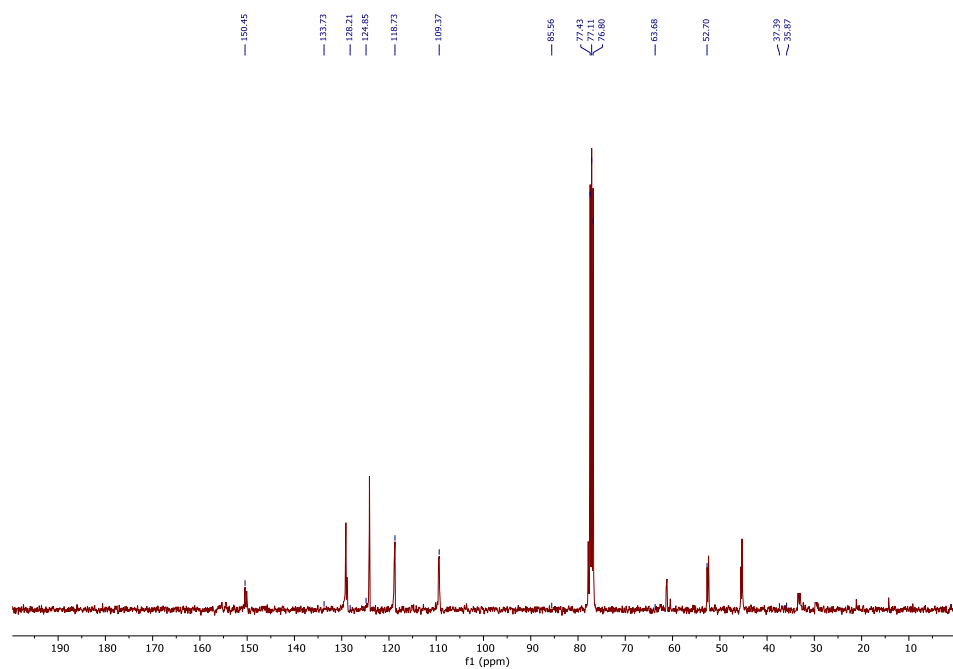

## Display Report

**Analysis Info**

Analysis Name D:\Data\User\_data\2021\OCTOBER\ab\_aks\_chi.d  
 Method Tune\_pos\_Standard.m  
 Sample Name ab\_aks\_chi  
 Comment

Acquisition Date 10/18/2021 1:57:23 PM  
 Operator IISER Kolkata  
 Instrument maXis impact 8282001.00127

**Acquisition Parameter**

|             |          |                      |          |                  |           |
|-------------|----------|----------------------|----------|------------------|-----------|
| Source Type | ESI      | Ion Polarity         | Positive | Set Nebulizer    | 0.5 Bar   |
| Focus       | Active   | Set Capillary        | 3400 V   | Set Dry Heater   | 200 °C    |
| Scan Begin  | 50 m/z   | Set End Plate Offset | -500 V   | Set Dry Gas      | 4.0 l/min |
| Scan End    | 1000 m/z | Set Charging Voltage | 2000 V   | Set Divert Valve | Source    |
|             |          | Set Corona           | 0 nA     | Set APCI Heater  | 0 °C      |

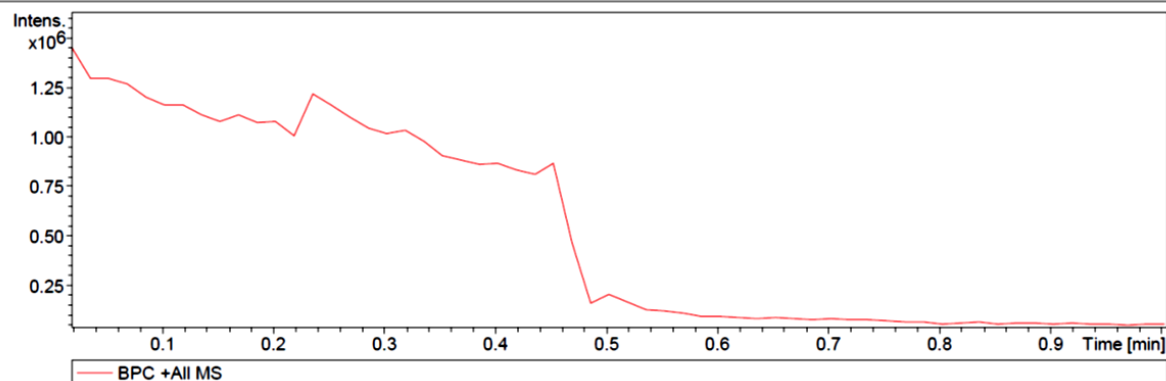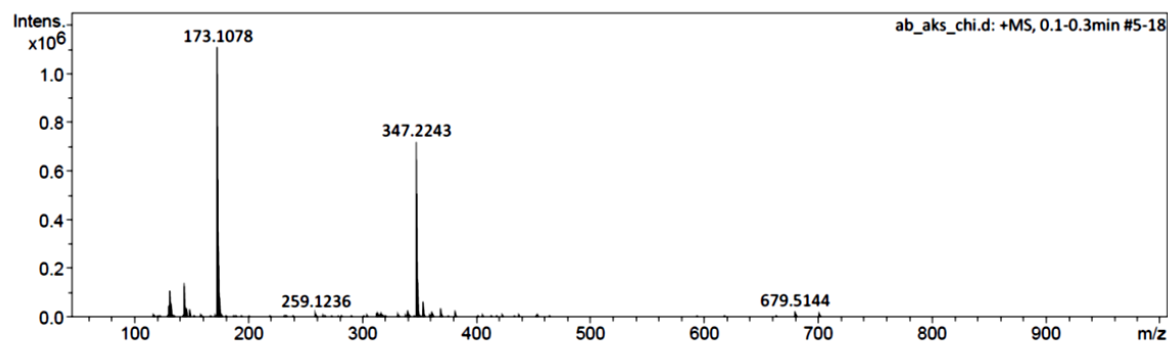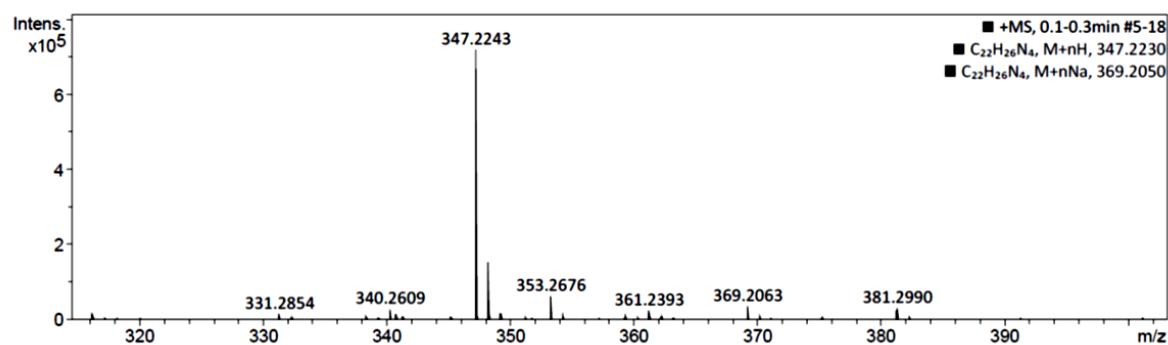

ab\_aks\_chi.d

Bruker Compass DataAnalysis 4.1

printed: 10/18/2021 2:05:03 PM

by: IISER Kolkata

Page 1 of 1

Scanned copy of mass spectrum of (+)-Chimonanthine [(+)-**2a**]

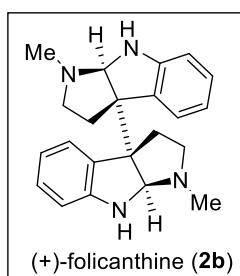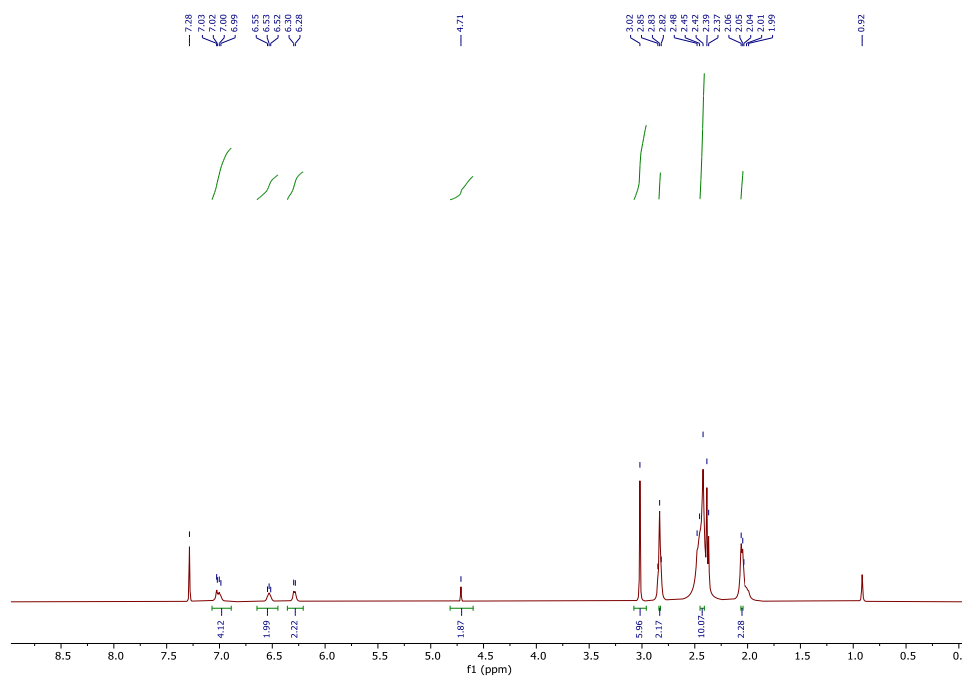

<sup>1</sup>H NMR (400 MHz, CDCl<sub>3</sub>) of (+)-Folicanthine [(+)-**2b**]

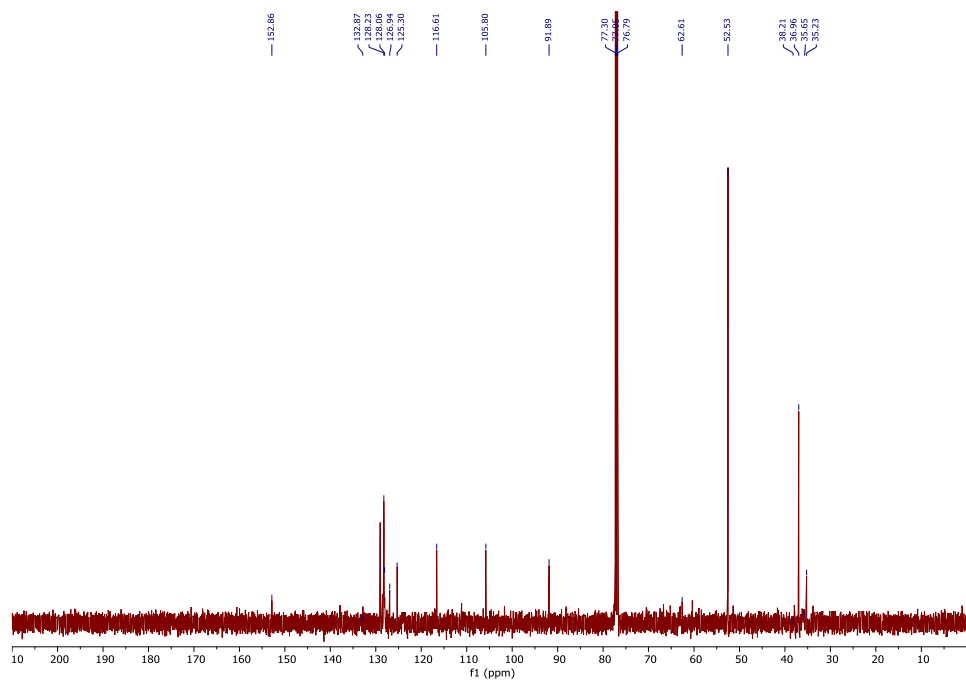

<sup>13</sup>C NMR (100 MHz, CDCl<sub>3</sub>) of (+)-Folicanthine [(+)-**2b**]

## Display Report

## Analysis Info

Analysis Name D:\Data\new user data 2021\august-2021\11-augAK-foli.d  
Method tune\_wide.m  
Sample Name AK-foli  
Comment

Acquisition Date 8/11/2021 1:45:13 PM

Operator RUCHI  
Instrument micrOTOF-Q II 10330

## Acquisition Parameter

|             |            |                       |           |                  |           |
|-------------|------------|-----------------------|-----------|------------------|-----------|
| Source Type | ESI        | Ion Polarity          | Positive  | Set Nebulizer    | 0.4 Bar   |
| Focus       | Not active | Set Capillary         | 4500 V    | Set Dry Heater   | 180 °C    |
| Scan Begin  | 50 m/z     | Set End Plate Offset  | -500 V    | Set Dry Gas      | 4.0 l/min |
| Scan End    | 3000 m/z   | Set Collision Cell RF | 600.0 Vpp | Set Divert Valve | Waste     |

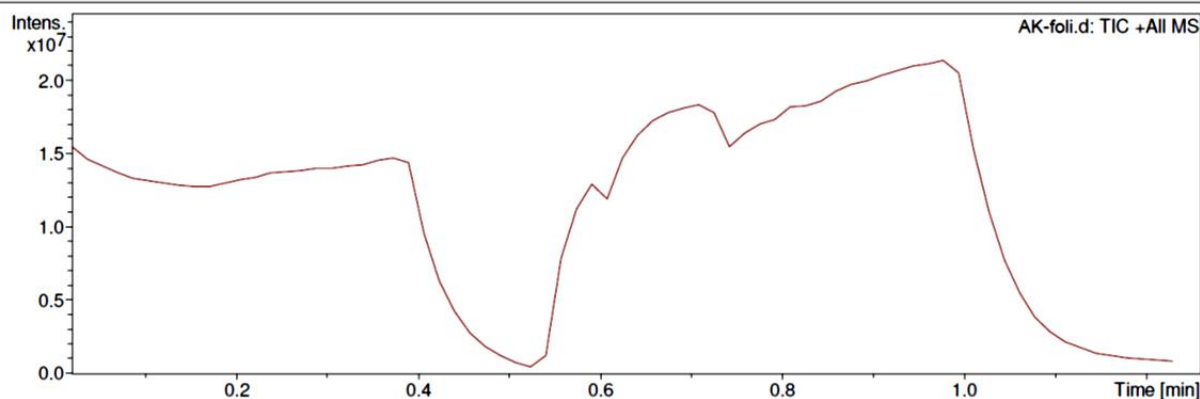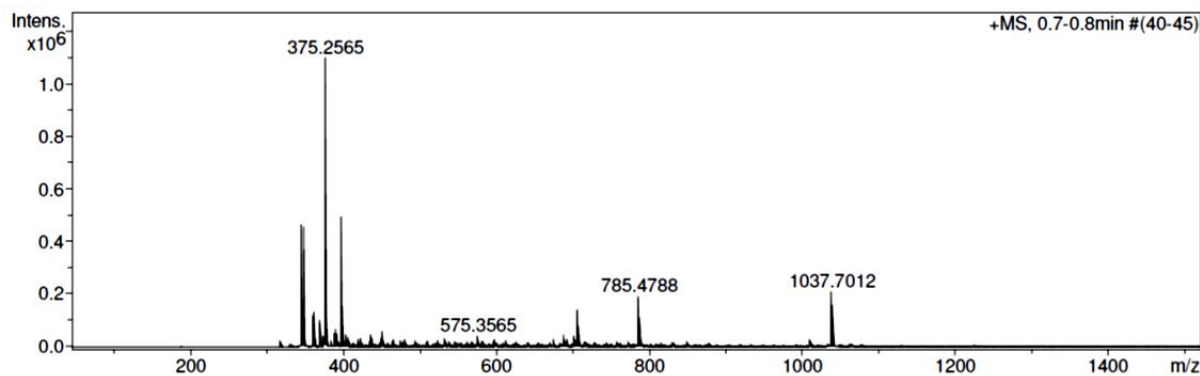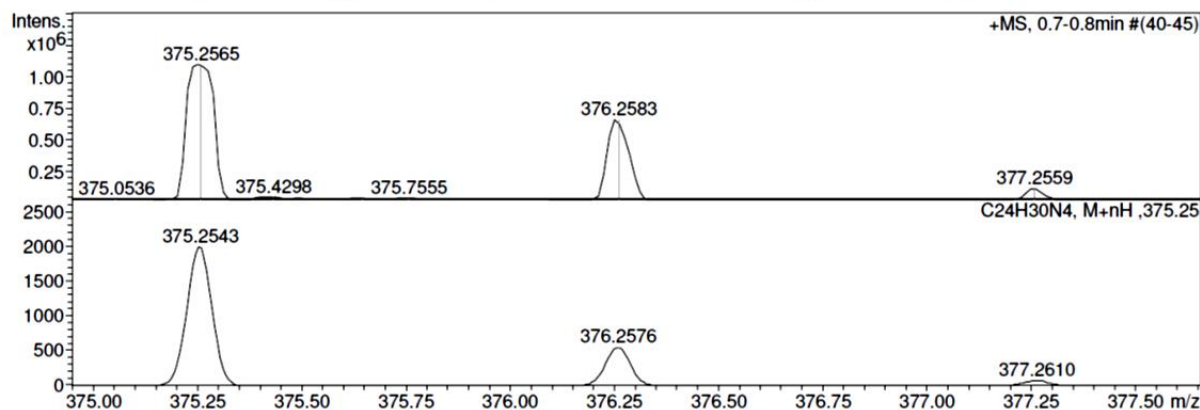

HRMS of (+)-Folicanthine [(+)-2b]

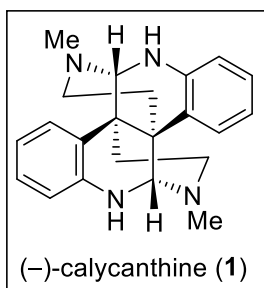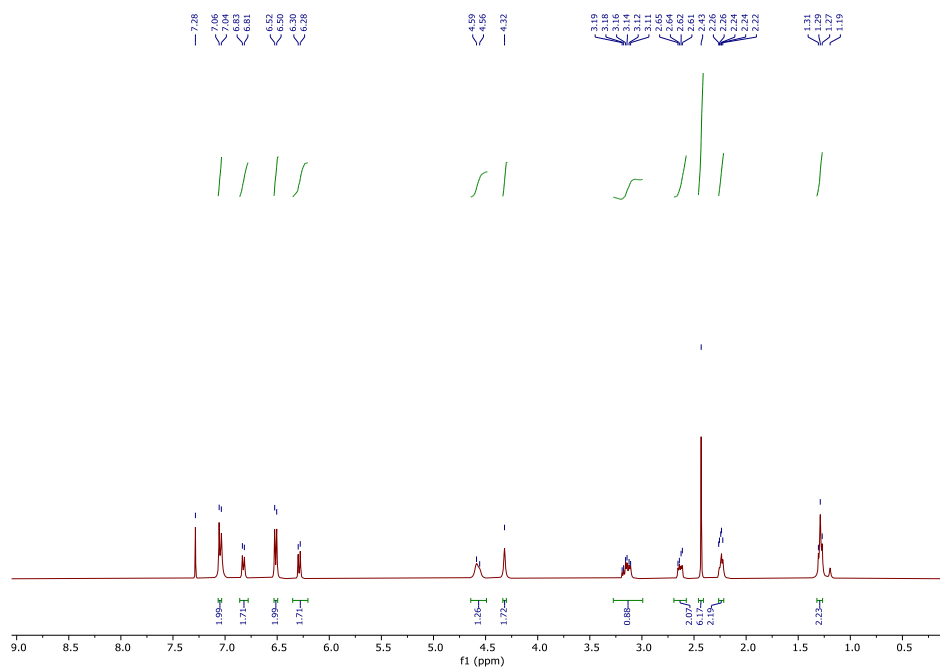

<sup>1</sup>H NMR (400 MHz, CDCl<sub>3</sub>) of (-)-Calycanthine [(-)-**1**]

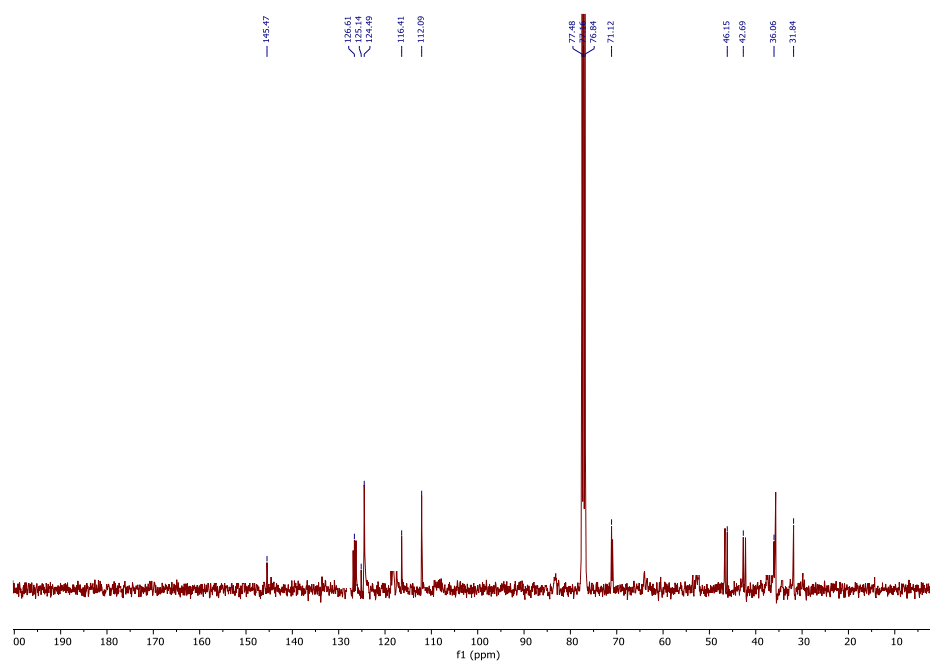

<sup>13</sup>C NMR (100 MHz, CDCl<sub>3</sub>) of (-)-Calycanthine [(-)-**1**]

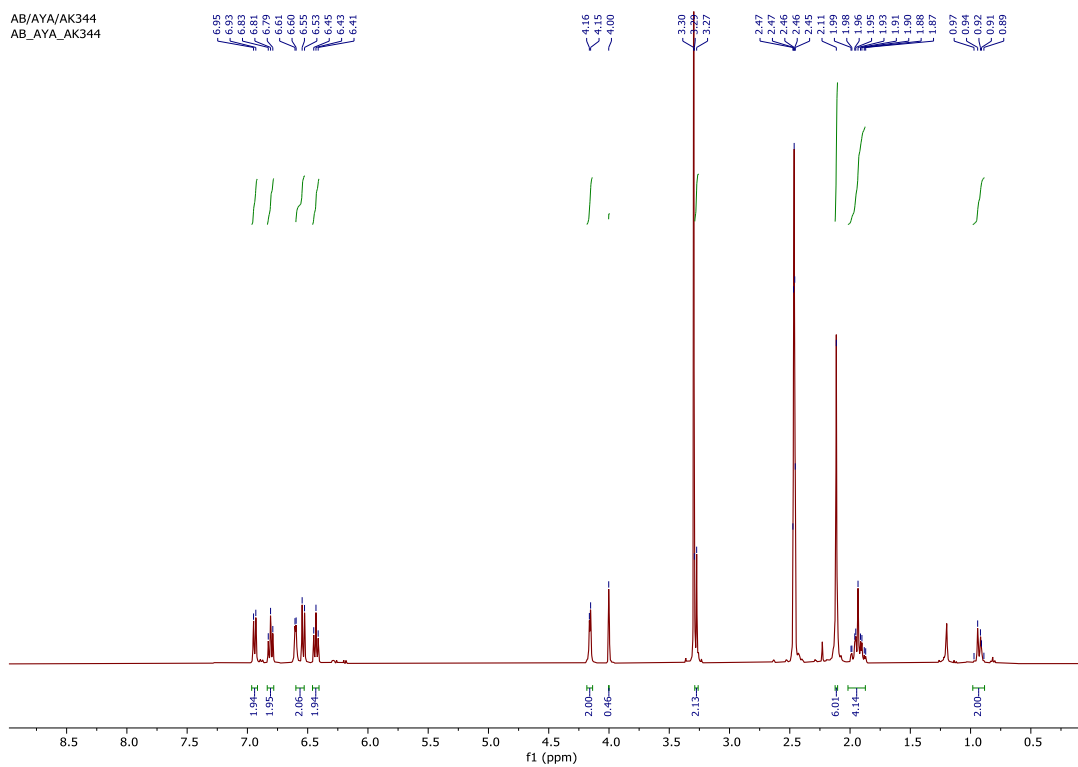

$^1\text{H}$  NMR (400 MHz,  $\text{DMSO}-d_6$ ) of  $(-)$ -Calycanthine  $[(-)-\mathbf{1}]$

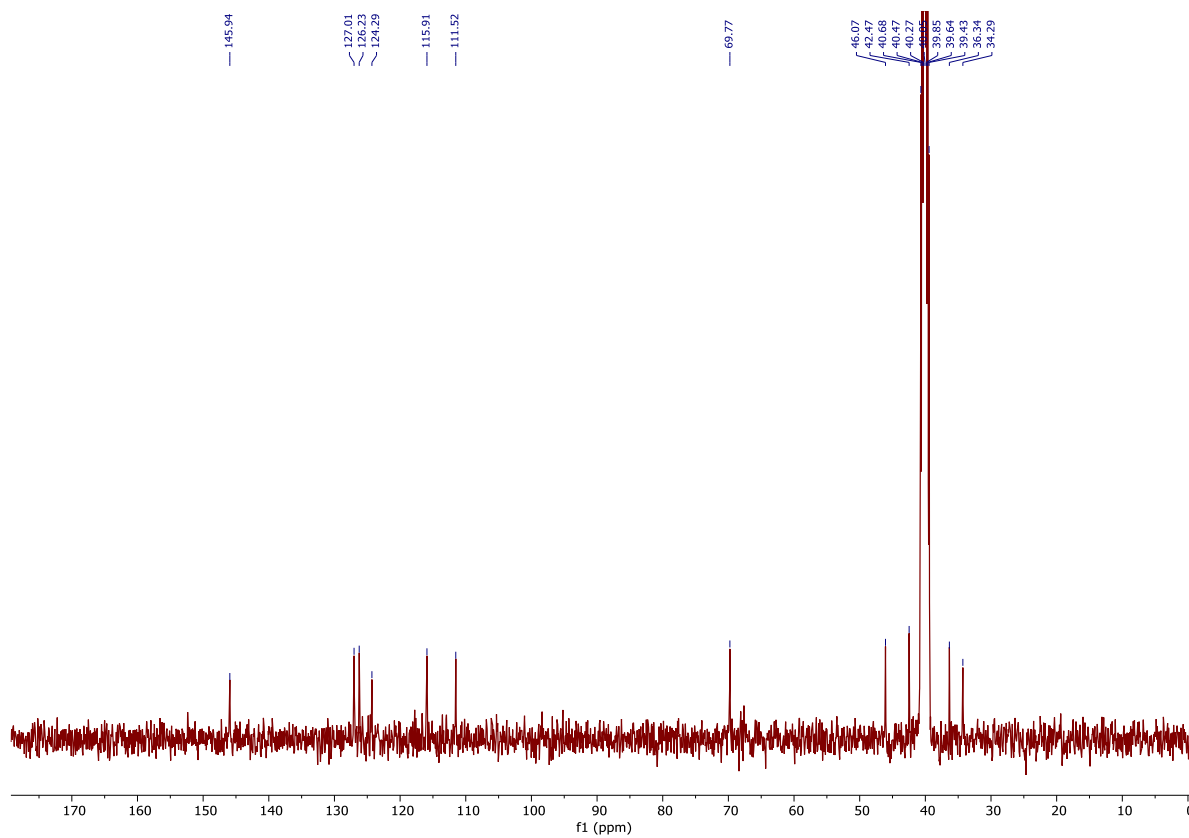

$^{13}\text{C}$  NMR (100 MHz,  $\text{DMSO}-d_6$ ) of  $(-)$ -Calycanthine  $[(-)-\mathbf{1}]$

## Display Report

**Analysis Info**

Analysis Name D:\Data\User\_data\2021\OCTOBER\lab\_ak\_caly.d  
 Method Tune\_pos\_Standard.m  
 Sample Name ab\_ak\_caly  
 Comment

Acquisition Date 10/18/2021 2:12:20 PM

Operator IISER Kolkata  
 Instrument maXis impact 8282001.00127

**Acquisition Parameter**

|             |          |                      |          |                  |           |
|-------------|----------|----------------------|----------|------------------|-----------|
| Source Type | ESI      | Ion Polarity         | Positive | Set Nebulizer    | 0.5 Bar   |
| Focus       | Active   | Set Capillary        | 3400 V   | Set Dry Heater   | 200 °C    |
| Scan Begin  | 50 m/z   | Set End Plate Offset | -500 V   | Set Dry Gas      | 4.0 l/min |
| Scan End    | 1000 m/z | Set Charging Voltage | 2000 V   | Set Divert Valve | Source    |
|             |          | Set Corona           | 0 nA     | Set APCI Heater  | 0 °C      |

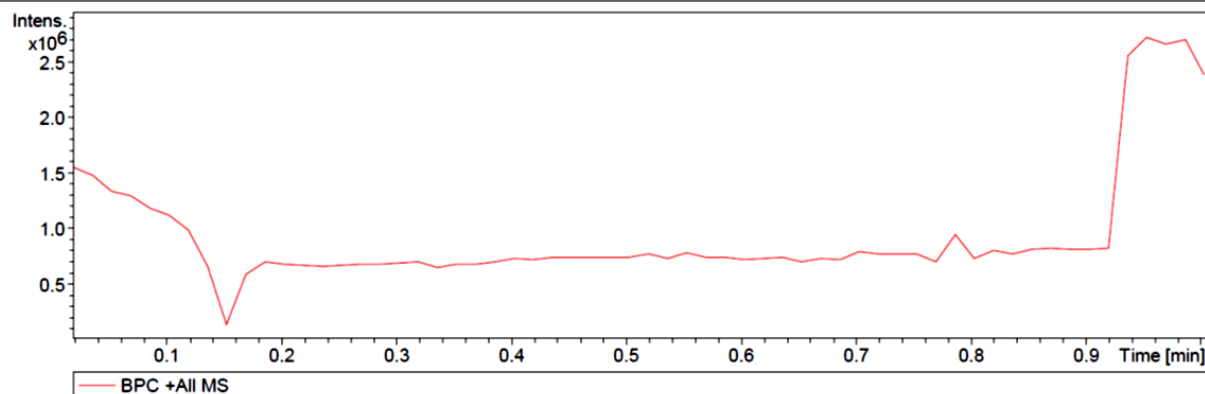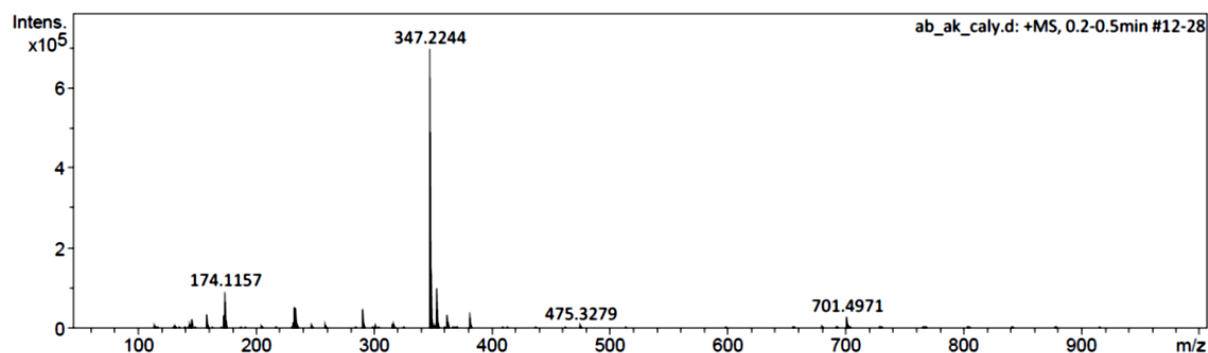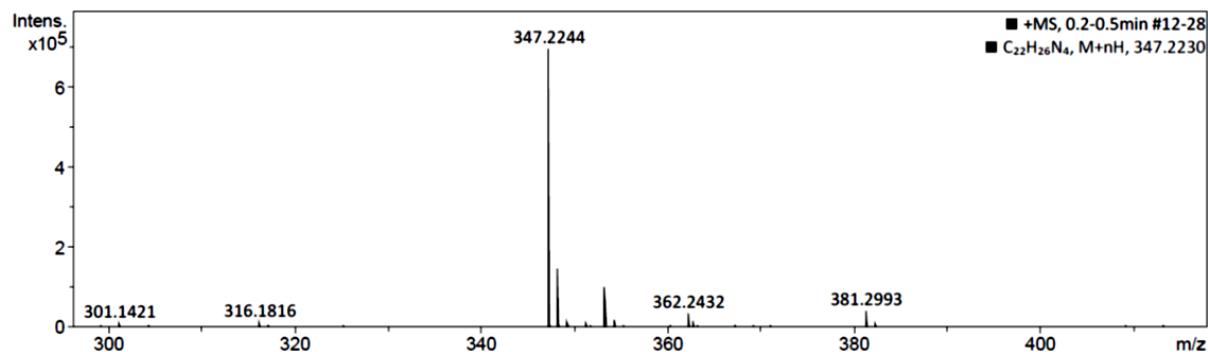

ab\_ak\_caly.d

Bruker Compass DataAnalysis 4.1

printed: 10/18/2021 2:14:36 PM

by: IISER Kolkata

Page 1 of 1

HRMS of (–)-Calycanthine [(–)-**1**]
